# Supplementary material for: Prevalence of possible sarcopenia in community-dwelling older Chinese adults: a cross-sectional study
Source: PubMed Central journal article supplement — BMJ Open. 2022 Dec 14;12(12):e067425. doi: 10.1136/bmjopen-2022-067425 (PMC9756196; doi:10.1136/bmjopen-2022-067425), 2022-12-14
Supplement: bmjopen-2022-067425.draft_revisions.pdf [file bmjopen-2022-067425.draft_revisions.pdf]

# BMJ Open

BMJ Open is committed to open peer review. As part of this commitment we make the peer review history of every article we publish publicly available.

When an article is published we post the peer reviewers' comments and the authors' responses online. We also post the versions of the paper that were used during peer review. These are the versions that the peer review comments apply to.

The versions of the paper that follow are the versions that were submitted during the peer review process. They are not the versions of record or the final published versions. They should not be cited or distributed as the published version of this manuscript.

BMJ Open is an open access journal and the full, final, typeset and author-corrected version of record of the manuscript is available on our site with no access controls, subscription charges or pay-per-view fees (<http://bmjopen.bmj.com>).

If you have any questions on BMJ Open's open peer review process please email [info.bmjopen@bmj.com](mailto:info.bmjopen@bmj.com)

# BMJ Open

## Prevalence of possible sarcopenia in community-dwelling older Chinese adults: a cross-sectional study

|                               |                                                                                                                                                                                                                                                                                                                                                                                                                                   |
|-------------------------------|-----------------------------------------------------------------------------------------------------------------------------------------------------------------------------------------------------------------------------------------------------------------------------------------------------------------------------------------------------------------------------------------------------------------------------------|
| Journal:                      | <i>BMJ Open</i>                                                                                                                                                                                                                                                                                                                                                                                                                   |
| Manuscript ID                 | bmjopen-2022-067425                                                                                                                                                                                                                                                                                                                                                                                                               |
| Article Type:                 | Original research                                                                                                                                                                                                                                                                                                                                                                                                                 |
| Date Submitted by the Author: | 13-Aug-2022                                                                                                                                                                                                                                                                                                                                                                                                                       |
| Complete List of Authors:     | Yao, Jiaqin; Bengbu Medical College, School of nursing<br>Wang, Yaoting; Bengbu Medical College, School of Continuing Education<br>Yang, Lin; Bengbu Medical College, School of nursing<br>Ren, Mengting; Bengbu Medical College, School of nursing<br>Li, LingYan; The First Affiliated Hospital of Bengbu Medical College, Department of Hepatobiliary Surgery<br>Wang, Hongyu; Bengbu Medical College, Physical fitness center |
| Keywords:                     | GERIATRIC MEDICINE, PREVENTIVE MEDICINE, PRIMARY CARE, PUBLIC HEALTH                                                                                                                                                                                                                                                                                                                                                              |
|                               |                                                                                                                                                                                                                                                                                                                                                                                                                                   |

SCHOLARONE™  
Manuscripts

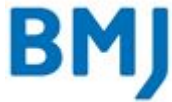

I, the Submitting Author has the right to grant and does grant on behalf of all authors of the Work (as defined in the below author licence), an exclusive licence and/or a non-exclusive licence for contributions from authors who are: i) UK Crown employees; ii) where BMJ has agreed a CC-BY licence shall apply, and/or iii) in accordance with the terms applicable for US Federal Government officers or employees acting as part of their official duties; on a worldwide, perpetual, irrevocable, royalty-free basis to BMJ Publishing Group Ltd ("BMJ") its licensees and where the relevant Journal is co-owned by BMJ to the co-owners of the Journal, to publish the Work in this journal and any other BMJ products and to exploit all rights, as set out in our [licence](#).

The Submitting Author accepts and understands that any supply made under these terms is made by BMJ to the Submitting Author unless you are acting as an employee on behalf of your employer or a postgraduate student of an affiliated institution which is paying any applicable article publishing charge ("APC") for Open Access articles. Where the Submitting Author wishes to make the Work available on an Open Access basis (and intends to pay the relevant APC), the terms of reuse of such Open Access shall be governed by a Creative Commons licence – details of these licences and which [Creative Commons](#) licence will apply to this Work are set out in our licence referred to above.

Other than as permitted in any relevant BMJ Author's Self Archiving Policies, I confirm this Work has not been accepted for publication elsewhere, is not being considered for publication elsewhere and does not duplicate material already published. I confirm all authors consent to publication of this Work and authorise the granting of this licence.

# Prevalence of possible sarcopenia in community-dwelling older Chinese adults: a cross-sectional study

Jiaqin Yao<sup>1</sup>·Yaoting Wang<sup>2</sup>·Lin Yang<sup>1</sup>·Mengting Ren<sup>1</sup>·LingYan Li<sup>3</sup>·Hongyu Wang<sup>4</sup>

<sup>1</sup>School of nursing, Bengbu Medical College, Bengbu, Anhui, China

<sup>2</sup>School of Continuing Education, Bengbu Medical College, Bengbu, Anhui, China

<sup>3</sup>Department of Hepatobiliary Surgery, the First Affiliated Hospital of Bengbu Medical College, Bengbu, Anhui, China

<sup>4</sup>Physical fitness center, Bengbu Medical College, Bengbu, Anhui, China

**Corresponding author:** Hongyu Wang

**E-mail:** [wanghongyu81920@163.com](mailto:wanghongyu81920@163.com)

## Abstract

**Objectives** To determine the prevalence of possible sarcopenia and its association with other conditions in older adults in Bengbu, China.

**Design, setting and participants** A cross-sectional study of 1082 community-dwelling Chinese people aged at least 60 years from March to June, 2022.

**Methods** Handgrip strength and information regarding associated conditions were collected. Possible sarcopenia was estimated based on handgrip strength with cut-off values recommended by AWGS 2019. Mann-Whitney U tests, Chi-square tests and binary regression analyses were used to explore relationships between possible sarcopenia and associated conditions.

**Results** Possible sarcopenia was more prevalent in men (52.79%, n = 246, age 79.43 ± 7.33 years) than in women (44.48%, n = 274, age 78.90 ± 7.71 years). In men, possible sarcopenia positively correlated with age (odds ratio (OR) = 2.658, 95% CI 1.758-4.019), physical inactivity (OR = 2.779, 95% CI 1.646-4.691) and diabetes (OR = 4.269, 95% CI 2.397-7.602), and negatively with hypertension (OR = 0.586, 95% CI 0.384-0.893) and BMI (OR = 0.874, 95% CI 0.817-0.935). In women, possible sarcopenia positively correlated with age (OR = 3.821, 95% CI 2.677-5.455), physical inactivity (OR = 2.185, 95% CI 1.488-3.210) and arthritis (OR = 2.076, 95% CI 1.411-3.056).

**Conclusion** The prevalence of possible sarcopenia in older adults is high, and it is more common

1  
2  
3  
4 among men than women. Men with high age, low BMI, physical inactivity, diabetes and no  
5 hypertension had a higher prevalence of possible sarcopenia; women with high age, physical  
6 inactivity and arthritis had a higher prevalence of possible sarcopenia.  
7  
8

9 **Keywords** Possible sarcopenia · Older people · AWGS · Handgrip strength

### 11 **Strengths and limitations of this study**

12  
13 This study assessed possible sarcopenia using the latest guideline (AWGS 2019) and analyzed  
14 two subgroups based on gender. However, several limitations should be mentioned.

15  
16 The findings may not be generalizable to other populations.

17  
18 We did not investigate nutritional factors that may be related to possible sarcopenia.  
19

### 21 **Introduction**

22  
23 As an independent disease in the 10<sup>th</sup> edition of International Classification of Diseases,  
24 sarcopenia has become an important public health issue <sup>1</sup>. Sarcopenia is a geriatric syndrome  
25 characterized by loss of muscle mass and muscle strength and decreased physical function <sup>2</sup>.  
26 Substantial evidence suggests that sarcopenia has an important impact on the health of older adults,  
27 and it often is associated with adverse outcomes such as illness, falls, reduced quality of life and  
28 even death <sup>3</sup>. Sarcopenia is not only associated with aging, but it can also result from a combination  
29 of chronic diseases including respiratory disease <sup>4</sup>, diabetes <sup>5</sup> and cancer <sup>6</sup>. It is associated with  
30 environmental factors, and the risk of developing sarcopenia can be lowered by changes to physical  
31 activity and diet <sup>7 8</sup>.  
32  
33  
34  
35  
36  
37  
38  
39

40  
41 In order to help predict the occurrence of sarcopenia in at-risk populations, the concept of  
42 “probable sarcopenia” was introduced in the guideline of the European Working Group on  
43 Sarcopenia in Older People (EWGSOP) in 2018. The guideline considered low muscle strength to  
44 be an indicator of probable sarcopenia <sup>9</sup>. In 2019, the Asia Working Group for Sarcopenia updated  
45 the guideline and proposed the concept of “possible sarcopenia”, which was defined as the existence  
46 of low muscle strength with or without reduced physical performance <sup>10</sup>. Both guidelines  
47 recommend using handgrip strength to assess muscle strength, but there are slight differences in  
48 threshold values used for diagnosis <sup>9 10</sup>.  
49  
50  
51  
52  
53  
54  
55

56  
57 The uses of these two international guidelines lead to differences in the reported prevalence of  
58 possible sarcopenia among different populations. One study determined that the prevalence of  
59  
60

1  
2  
3  
4 probable sarcopenia in a Colombian community was 46.5% based on threshold values from  
5 EWGSOP2 <sup>11</sup>. On the other hand, the values of the prevalence of probable sarcopenia in Swiss  
6 women and men were determined to be 26.3 and 28.0%, respectively <sup>12</sup>. In a South Korean study,  
7 Kim et al used the cut-off values recommended by the AWGS 2019 to screen for the possible  
8 sarcopenia and found a prevalence of 20.1% in men and a prevalence of 29.2% in women <sup>13</sup>.  
9  
10

11  
12  
13 Despite renewed interest in the condition, no studies have been performed to investigate the  
14 possible sarcopenia and related factors in China. Therefore, the aims of this study were (1) to  
15 determine the prevalence of possible sarcopenia using the latest guideline (AWGS 2019) in a sample  
16 of older adults, aged 60 years and above, in Bengbu, China and (2) to explore the relationship  
17 between possible sarcopenia and its associated factors.  
18  
19  
20  
21  
22

## 23 **Methods**

### 24 **Sample**

25  
26  
27 This was a cross-sectional, community-based study conducted in the city of Bengbu, China,  
28 from March, 2022, through June, 2022. Inclusion criteria for study participants were aged at least  
29 60 years, ability to understand relevant issues and ability to provide informed consent. Exclusion  
30 criteria were inability to complete the handgrip strength measurement and lack of complete medical  
31 or demographic data.  
32  
33  
34  
35

36  
37 The minimum sample size was calculated to be 792 elderly individuals, assuming a prevalence  
38 of possible sarcopenia of 24.6% <sup>13</sup>, at a 3% error rate and 95% confidence interval. After considering  
39 the design effect as 1.5, the aim was to access a minimum sample size of 1188 individuals. Multi-  
40 stage random cluster sampling and random numbers table were conducted. First, all the streets were  
41 listed and 7 streets were randomly grouped. Then, 3 communities were randomly grouped into each  
42 street. Finally, citizens aged 60 and above were randomly selected from each community. As a result,  
43 the final sample included 1082 elderly participants for a 91.08% response rate (Figure 1). Each  
44 participant signed an informed consent form. The Ethics Committee of Bengbu Medical College  
45 approved the study protocol (Anhui, China; no.2018045).  
46  
47  
48  
49  
50  
51  
52  
53

### 54 **Anthropometric measurements**

55  
56 All physical examinations were performed by trained medical students according to  
57 standardized procedures. Height and body weight were measured with a steel measuring tape and  
58  
59  
60

1  
2  
3  
4 an electronic scale, respectively. Body mass index (BMI) was calculated as the square of the weight  
5 in kilograms divided by the height in meters. Waist circumference was measured from the middle  
6 point between the lower border of the rib cage and the iliac crest midaxillary at the end of a normal  
7 expiration with a soft measuring tape.  
8  
9

### 10 11 **Assessment of possible sarcopenia**

12  
13 AWGS criteria (2019) define possible sarcopenia as the incidence of low muscle strength with  
14 or without reduced physical performance, therefore, in this study, low muscle strength was the only  
15 criterion used to define possible sarcopenia. Low muscle strength was defined as a handgrip strength  
16 of less than 28 kg in men and less than 18 kg in women. Handgrip strength was measured with an  
17 electronic hand dynamometer (EH101, <https://www.senssun.com>). Prior to use, the dynamometer  
18 was calibrated according to the manufacturer's instructions. Each participant was asked to hold the  
19 dynamometer with the dominant hand with as much force as possible for 3 s. This process was  
20 repeated three times with 30 s between each trial, and the handgrip strength was taken as the  
21 maximum value from these three trials.  
22  
23

### 24 25 **Measurement of potential associated factors**

26  
27 Participants were sorted into two groups based on WHO age classification criteria: one group  
28 included participants that were aged 60 to 74 years and the other group included participants who  
29 were aged at least 75 years. Participants' level of physical activity was determined using self-  
30 reported values. According to the latest *World Health Organization 2020 Guidelines on Pactivity*  
31 *and Sedentary Behavior*<sup>14</sup>, physical inactivity was defined as engagement in less than 150 minutes  
32 per week of moderate exercise, such as brisk walking, jogging or dancing (time of high intensity  
33 physical activity multiplied by 2 translates to time of moderate physical activity). Disease-related  
34 factors were assessed with a survey that asked the participants if they had been medically diagnosed  
35 with cancer, heart disease, hypertension, hyperlipidemia, diabetes, respiratory diseases, arthritis, or  
36 pain in the waist or lower extremities.  
37  
38

### 39 40 **Statistical analysis**

41  
42 SPSS 25.0 software (IBM, Armonk, NY, USA) was utilized for data analyses. Continuous  
43 variables were expressed as mean  $\pm$  SD. Categorical variables were expressed as frequencies and  
44 percentages. The normality of the variables was verified using Kolmogorov-Smirnov tests. The  
45  
46  
47  
48  
49  
50  
51

1  
2  
3  
4 male and female samples were divided into two groups: no sarcopenia (normal handgrip strength)  
5 or possible sarcopenia (weak handgrip strength). Student's t-tests were applied to identify  
6 significant differences in normally distributed of continuous variables, while Mann-Whitney U tests  
7 were used for comparison of non-normal distributions of continuous variables between groups. The  
8 significance of differences in baseline characteristics were examined using chi-squared tests for  
9 categorical variables. Binary logistic regression was used to explore the relationship between each  
10 category of associated factors and possible sarcopenia.  
11  
12  
13  
14  
15  
16

## 17 Results

18  
19 Data on handgrip strength and anthropometric measures were collected from 1,082 adults aged  
20 60 years and over, (n = 466 men, n = 616 women; mean age 76.62 ± 7.11 years). Of the participants,  
21 484 (44.73%) were aged from 60 to 74 years, and 598 (55.27%) were aged at least 75 years.  
22  
23

24  
25 Possible sarcopenia was determined according to the AWGS 2019 guidelines with gender-  
26 specific handgrip strength cut-off values. Of the 466 male participants, possible sarcopenia was  
27 identified in 246 (52.79%). Of the 598 female participants, possible sarcopenia was identified in  
28 274 (44.48%). In both men and women, the majority of participants identified as having possible  
29 sarcopenia are aged 75 years and over.  
30  
31  
32  
33

34  
35 Height and weight were significantly lower in the possible sarcopenia group than in the no  
36 sarcopenia group (both  $p < 0.05$ ). Among male participants, BMI was significantly lower in the  
37 possible sarcopenia group than in the group of no sarcopenia ( $p < 0.05$ ), but there was no statistically  
38 significant difference in BMI among female participants ( $p > 0.05$ ). Moreover, the possible  
39 sarcopenia group had a great number of participants who were classified as physically inactive  
40 (Table 1).  
41  
42  
43  
44  
45  
46

47  
48 In male participants, older adults with possible sarcopenia were significantly more likely than  
49 those without possible sarcopenia to have developed diabetes (22.67% vs 11.82%;  $p < 0.05$ ) and  
50 respiratory diseases (9.76% vs 3.64%;  $p < 0.05$ ). Conversely, participants with possible sarcopenia  
51 were significantly less likely to have developed hypertension (45.93% vs 57.73%;  $p < 0.05$ ). In  
52 female participants, older adults with possible sarcopenia were significantly more likely than those  
53 without possible sarcopenia to have developed arthritis (47.81% vs 30.41%;  $p < 0.05$ ), and pain in  
54 the waist or lower extremities (61.68% vs 53.80%;  $p < 0.05$ ) (Table 1).  
55  
56  
57  
58  
59  
60



Table 1 Characteristics of participants with or without possible sarcopenia

|                                                  | Overall<br>sample<br>(n = 1082) | Men, n = 466 (43.07%)                    |                                    | P value | Women, n=616 (56.93%)                    |                                       |         |
|--------------------------------------------------|---------------------------------|------------------------------------------|------------------------------------|---------|------------------------------------------|---------------------------------------|---------|
|                                                  |                                 | Possible sarcopenia<br>(n = 246; 52.79%) | No sarcopenia<br>(n = 220; 47.21%) |         | Possible sarcopenia<br>(n = 274; 44.48%) | No sarcopenia<br>(n =3 42;<br>55.52%) | P value |
| Age (years)                                      | 76.62 ± 7.11                    | 79.43 ± 7.33                             | 74.27 ± 4.92                       | < 0.001 | 78.90 ± 7.71                             | 74.29 ± 6.31                          | < 0.001 |
| Age group (n, %)                                 |                                 |                                          |                                    |         |                                          |                                       |         |
| 60-74 years                                      | 484 (44.73)                     | 78 (31.71)                               | 122 (55.45)                        | < 0.001 | 82 (29.93)                               | 202 (59.06)                           | < 0.001 |
| ≥ 75 years                                       | 598 (55.27)                     | 168 (68.29)                              | 98 (44.55)                         |         | 192 (70.07)                              | 140 (40.94)                           |         |
| Height (cm)                                      | 158.31 ± 9.28                   | 162.64 ± 6.39                            | 166.11 ± 10.02                     | < 0.001 | 151.00 ± 6.92                            | 156.04 ± 6.31                         | < 0.001 |
| Weight (kg)                                      | 63.42 ± 12.27                   | 64.61 ± 10.12                            | 71.80 ± 10.14                      | < 0.001 | 56.96 ± 10.55                            | 62.35 ± 12.95                         | < 0.001 |
| WC (cm)                                          | 90.83 ± 9.95                    | 91.26 ± 10.01                            | 91.95 ± 7.92                       | 0.204   | 89.83 ± 10.76                            | 90.59 ± 10.35                         | 0.553   |
| handgrip strength (kg)                           | 22.91 ± 8.57                    | 21.49 ± 5.21                             | 35.42 ± 5.11                       | < 0.001 | 13.85 ± 3.72                             | 23.14 ± 4.13                          | < 0.001 |
| BMI (kg/m <sup>2</sup> )                         | 25.40 ± 6.75                    | 24.42 ± 3.49                             | 26.62 ± 11.42                      | < 0.001 | 25.00 ± 4.68                             | 25.63 ± 5.72                          | 0.428   |
| Physical inactivity<br>(n, %)                    | 270 (24.95)                     | 71 (28.86)                               | 28 (12.73)                         | < 0.001 | 97 (35.40)                               | 74 (21.64)                            | < 0.001 |
| Cancer (n, %)                                    | 18 (1.66)                       | 6 (2.44)                                 | 2 (0.91)                           | 0.204   | 6 (2.19)                                 | 4 (1.17)                              | 0.319   |
| Heart diseases (n, %)                            | 345 (31.89)                     | 70 (28.45)                               | 76 (34.55)                         | 0.157   | 80 (29.20)                               | 119 (34.80)                           | 0.140   |
| Hypertension (n, %)                              | 599 (55.36)                     | 113 (45.93)                              | 127 (57.73)                        | 0.011   | 170 (62.04)                              | 189 (55.26)                           | 0.090   |
| Hyperlipidemia (n, %)                            | 208 (19.22)                     | 46 (18.70)                               | 44 (20.00)                         | 0.723   | 48 (17.52)                               | 70 (20.47)                            | 0.355   |
| Diabetes (n, %)                                  | 201 (18.58)                     | 56 (22.76)                               | 26 (11.82)                         | 0.002   | 54 (19.71)                               | 65 (19.01)                            | 0.836   |
| Respiratory diseases<br>(n, %)                   | 93 (8.60)                       | 24 (9.76)                                | 8 (3.64)                           | 0.009   | 32 (11.68)                               | 29 (8.48)                             | 0.186   |
| Arthritis (n, %)                                 | 349 (32.26)                     | 59 (23.98)                               | 55 (25.00)                         | 0.799   | 131 (47.81)                              | 104 (30.41)                           | < 0.001 |
| Pain in the waist or<br>lower extremities (n, %) | 534 (49.35)                     | 93 (37.80)                               | 89 (40.45)                         | 0.499   | 169 (61.68)                              | 184 (53.80)                           | 0.049   |

WC waist circumference; BMI body mass index

For male participants, a binary logistic regression analysis showed that the significantly

correlating variables age, BMI, physical inactivity, hypertension, diabetes and respiratory diseases explained whether a participant had possible sarcopenia or not to 65.9% (Nagelkerke's  $R^2 = 0.236$ , Chi-squared (6) = 90.767,  $p < 0.0001$ ). Higher age (Wald (1) = 21.478,  $p < 0.0001$ , OR = 2.658), physical inactivity (Wald (1) = 14.640,  $p < 0.0001$ , OR = 2.779) and diabetes (Wald (1) = 24.289,  $p < 0.0001$ , OR = 4.269) were risk factors for possible sarcopenia. Conversely, hypertension (Wald (1) = 6.174,  $p = 0.013$ , OR = 0.586) and higher BMI (Wald (1) = 15.378,  $p < 0.0001$ , OR = 0.874) were protective factors for possible sarcopenia. Respiratory disease did not have a significant association with possible sarcopenia (Table 2).

For female participants, a binary logistic regression analysis showed that the significantly correlating variables age, physical inactivity, arthritis and pain in lower extremities or waist explained whether a participant had possible sarcopenia or not to 67.4% (Nagelkerke's  $R^2 = 0.185$ , Chi-squared (4) = 91.593,  $p < 0.0001$ ). Higher age (Wald (1) = 54.498,  $p < 0.0001$ , OR = 3.821), physical inactivity (Wald (1) = 15.874,  $p < 0.0001$ , OR = 2.185) and arthritis (Wald (1) = 13.733,  $p < 0.0001$ , OR = 2.076) were risk factors for possible sarcopenia. However, pain in the lower extremities or waist did not have a significant association with possible sarcopenia (Table 3).

Table2 Binary logistic regression analysis of possible sarcopenia category by correlated variables

| Variables                             | Wald   | Degrees of freedom | P value | Exp(B)/Odd's ratio | 95%Confidence interval for Exp(B) |       |
|---------------------------------------|--------|--------------------|---------|--------------------|-----------------------------------|-------|
|                                       |        |                    |         |                    | Lower                             | Upper |
|                                       |        |                    |         |                    |                                   |       |
| Age ( $\geq 75$ years vs.60-74 years) | 21.478 | 1                  | < 0.001 | 2.658              | 1.758                             | 4.019 |
| Physical inactivity (yes vs. no)      | 14.640 | 1                  | < 0.001 | 2.779              | 1.646                             | 4.691 |
| Hypertension (yes vs. no)             | 6.174  | 1                  | 0.013   | 0.586              | 0.384                             | 0.893 |
| Diabetes (yes vs. no)                 | 24.289 | 1                  | < 0.001 | 4.269              | 2.397                             | 7.602 |
| Respiratory diseases (yes vs. no)     | 2.659  | 1                  | 0.103   | 2.169              | 0.855                             | 5.501 |
| BMI                                   | 15.378 | 1                  | < 0.001 | 0.874              | 0.817                             | 0.935 |
| Constant                              | 9.647  | 1                  | 0.002   | 14.990             |                                   |       |

Table3 Binary logistic regression analysis of possible sarcopenia category by correlated variables

| in women  |      |                    |         |                    |                                   |       |
|-----------|------|--------------------|---------|--------------------|-----------------------------------|-------|
| Variables | Wald | Degrees of freedom | P value | Exp(B)/Odd's ratio | 95%Confidence interval for Exp(B) |       |
|           |      |                    |         |                    | Lower                             | Upper |

|                                                        |        |   |         |       | Lower | Upper |
|--------------------------------------------------------|--------|---|---------|-------|-------|-------|
| Age ( $\geq 75$ years vs. 60-74 years)                 | 54.498 | 1 | < 0.001 | 3.821 | 2.677 | 5.455 |
| Physical inactivity (yes vs. no)                       | 15.874 | 1 | < 0.001 | 2.185 | 1.488 | 3.210 |
| Arthritis (yes vs. no)                                 | 13.733 | 1 | < 0.001 | 2.076 | 1.411 | 3.056 |
| Pain in the waist or lower extremities<br>(yes vs. no) | 0.756  | 1 | 0.384   | 1.186 | 0.807 | 1.742 |
| Constant                                               | 64.394 | 1 | < 0.001 | 0.207 |       |       |

## Discussion

We investigated the prevalence of possible sarcopenia and its correlation with associated factors. We found that possible sarcopenia has a high prevalence in the community of Bengbu. The prevalence of 48.06% is similar to the prevalence found in adults in the same age group in a study conducted in Colombia<sup>11</sup>. However, that prevalence is higher than that found in the Asian country of South Korea<sup>13</sup>. The reason for this discrepancy may be that the South Korean study used the calf circumference (CC) and SARC/SARC-F scale to screen participants prior to administering the handgrip strength test, whereas the present study and the Colombian study used handgrip strength test directly to identify possible sarcopenia. This difference suggests that many of the older adults in South Korea who were not candidates for the handgrip strength test according to calf circumference and SARC/SARC-F scale criteria may have had lower handgrip strengths indicative of possible sarcopenia. Therefore, direct measurement of handgrip strength has important clinical value.

Our study found that possible sarcopenia is more common among men than women (52.77% in men and 44.48% in women), as did a study performed by Wearing et al<sup>12</sup> (28% in men and 26.3% in women). Interestingly, Pang et al<sup>15</sup> found that the prevalence of possible sarcopenia in men between the ages of 20 and 60 years (13%) is lower than that in women in the same age group (14.2%), but the relative prevalence in older adults over the age of 60 years is reversed (33.7% in men and 30.9% in women). A possible mechanism of pathogenesis of leading to differences in possible sarcopenia in men and women involves testosterone. Testosterone plays an important role in the development and maintenance of muscle mass and function and can increase muscle mass and muscle strength<sup>16,17</sup>. Testosterone in men declines at a rate of 1% per year after the age of 30,

1  
2  
3  
4 and 40 to 70% of men over the age of 70 have low testosterone levels <sup>18</sup>. This may be one of the  
5  
6 important reasons why the prevalence rate of older men is higher than that of women. It should be  
7  
8 noted that in the present study, the average age of male participants was significantly higher than  
9  
10 that of female participants, which may have contributed to the higher prevalence rate among men  
11  
12 than among women.

13  
14 We found that age and physical inactivity might positively influence the prevalence of possible  
15  
16 sarcopenia. The main cause of sarcopenia is muscle loss with age <sup>19</sup>, and the incidence of possible  
17  
18 sarcopenia increases with age <sup>20</sup>. Several studies have reported that physical inactivity is the primary  
19  
20 risk factor for decreased muscle strength <sup>21 22</sup>. Tsekoura et al <sup>23</sup> and Makizako et al <sup>24</sup> confirmed that  
21  
22 exercise intervention for older adults slows the decline of muscle strength with age. Nearly a quarter  
23  
24 of the participants were physically inactive, which is another potential explanation for the high  
25  
26 prevalence of possible sarcopenia observed in this study. The correlations of age and physical  
27  
28 inactivity with possible sarcopenia suggests that encouraging more physical activity in older adults  
29  
30 is particularly important to prevent or delay the onset and progression of sarcopenia.

31  
32 The relationships of various factors to possible sarcopenia differed between the sexes. In men,  
33  
34 diabetes was found to have a strong correlation with possible sarcopenia. Diabetes was associated  
35  
36 with a 4.269-fold increase in the risk of possible sarcopenia in older men, but there was no  
37  
38 correlation found in older women. Likewise, a longitudinal study in the United Kingdom showed  
39  
40 an increase in probable sarcopenia after eight years in men with diabetes, but not in women <sup>25</sup>.  
41  
42 However, Anagnostis et al <sup>26</sup> reported that the risk of sarcopenia had a slightly higher elevation by  
43  
44 type 2 diabetes in men than in women, but the difference was not significant ( $p = 0.08$ ). Thus, it is  
45  
46 necessary to further investigate the existence of gender differences in the relationship between  
47  
48 diabetes and possible sarcopenia.

49  
50 We also found that hypertension is a protective factor for possible sarcopenia. Several studies  
51  
52 showed that patients taking angiotensin converting enzyme inhibitors (ACEI) as therapy for  
53  
54 hypertension had higher muscle strength than patients without hypertension and patients with  
55  
56 hypertension who were not taking ACEI <sup>27 28</sup>. Similarly, Ata et al pointed that ACEI therapy seems  
57  
58 to have favourable effects on both hypertension and sarcopenia <sup>29</sup>. Although more than half of the  
59  
60 participants in our study were hypertensive, the medications they were taking were not investigated,

1  
2  
3  
4 so the relationship between hypertensive medications and possible sarcopenia will be further  
5 explored in later studies.  
6

7 We also found that BMI is a protective factors for possible sarcopenia in men. Older adults  
8 with low BMI values may be underweight and at risk of malnutrition. From a pathophysiological  
9 point of view, both malnutrition and sarcopenia share an important component: a low-inflammatory  
10 state, a phenomenon that has been called inflamm-aging<sup>8</sup>. Therefore, early nutritional intervention  
11 for older patients with possible sarcopenia is an important strategy in decreasing the risk of  
12 progression to sarcopenia.  
13  
14

15 In our study, older adults with arthritis were found to have higher risk of sarcopenia in women.  
16 There are more than 100 types of arthritis. Rheumatoid arthritis (RA) is the most common form, but  
17 other common types of arthritis include osteoarthritis and inflammatory arthritis<sup>30</sup>. Several studies  
18 have shown that women are more likely to be diagnosed with RA than men<sup>31-33</sup>, and adults with  
19 RA tend to have lower muscle masses or strengths compared to adults without RA<sup>34-36</sup>. Notably,  
20 RA can cause joint pain and deformity, therefore, it is unclear to what extent decreases in handgrip  
21 strength in patients with RA reflect true low muscle strength and how much of the limited handgrip  
22 strength may be secondary to pain or deformity<sup>37</sup>. Thence, other measurements should be  
23 considered to assess the possible sarcopenia in arthritis adults.  
24  
25  
26  
27  
28  
29  
30  
31  
32  
33  
34  
35

36 The major strength of our study is that it assessed possible sarcopenia using the latest guideline  
37 (AWGS 2019) and analyzed two subgroups based on gender. However, several limitations should  
38 be mentioned. First, this study focused solely on a population of older adults in Bengbu, so findings  
39 may not be generalizable to other populations. Second, we did not investigate nutritional factors that  
40 may be related to possible sarcopenia; a nutrition survey will be added in future studies.  
41  
42  
43  
44  
45

## 46 **Conclusions**

47  
48 The prevalence of possible sarcopenia in older adults in Bengbu is high, and it is more common  
49 among men than women. Men with high age, low BMI, physical inactivity, diabetes and no  
50 hypertension had a higher prevalence of possible sarcopenia; women with high age, physical  
51 inactivity and arthritis had a higher prevalence of possible sarcopenia. Community health care  
52 institutions should pay attention to the screening of possible sarcopenia, especially among older  
53 men. Targeted health education should also be carried out to encourage older adults to actively  
54  
55  
56  
57  
58  
59  
60

participate in physical exercise.

**Acknowledgements** We want to thank all the participants involved in the study. We would also like to thank the hardworking research personnel involved in the data collection making this study possible.

**Funding** This work was supported in part by Major project of Humanities and Social Sciences in Universities of Anhui Province (SK2020ZD32), the 512 Talent Cultivation Program of Bengbu Medical College (by51201208) and the Graduate Research Innovation Plan of Bengbu Medical College in 2021 (Byycx21023).

**Conflict of interest** The authors have no conflicts of interest.

**Patient and public involvement** Patients and/or the public were not involved in the design, or conduct, or reporting, or dissemination plans of this research.

**Ethics approval** Ethical approval was obtained by the ethics committees of Bengbu Medical College (Anhui, China; no.2018045).

**Statement of human participants and/or animals** All the procedures performed in this study involving human participants were in accordance with the ethical standards of the institutional and national research committee and with the 1964 Declaration of Helsinki and its later amendments.

**Informed consent** All individual participants in the research gave their informed consent.

**Data availability statement** The data are held at Physical fitness center of Bengbu Medical College.

**Author contributions** Jiaqin Yao: conceptualization, methodology, data collection, writing, investigation, statistical analysis. Yaoting Wang: data collection, methodology, writing, investigation. Lin Yang: data collection, writing. Mengting Ren: data collection, writing. Lingyan Li: writing. Hongyu Wang: conceptualization, methodology, statistical analysis.

## References

1. Cao L, Morley JE. Sarcopenia Is Recognized as an Independent Condition by an International Classification of Disease, Tenth Revision, Clinical Modification (ICD-10-CM) Code. *J Am Med Dir Assoc* 2016;17(8):675-7.
2. Cruz-Jentoft AJ, Baeyens JP, Bauer JM, et al. Sarcopenia: European consensus on definition and diagnosis: Report of the European Working Group on Sarcopenia in Older People. *Age Ageing* 2010;39(4):412-23.
3. Keller K. Sarcopenia. *Wien Med Wochenschr* 2019;169(7-8):157-72.
4. Bone AE, Hepgul N, Kon S, et al. Sarcopenia and frailty in chronic respiratory disease. *Chron Respir Dis* 2017;14(1):85-99.
5. Izzo A, Massimino E, Riccardi G, et al. A Narrative Review on Sarcopenia in Type 2 Diabetes

- Mellitus: Prevalence and Associated Factors. *Nutrients* 2021;13(1):183.
6. Pamoukdjian F, Bouillet T, Lévy V, et al. Prevalence and predictive value of pre-therapeutic sarcopenia in cancer patients: A systematic review. *Clin Nutr* 2018;37(4):1101-13.
  7. Nascimento CM, Ingles M, Salvador-Pascual A, et al. Sarcopenia, frailty and their prevention by exercise. *Free Radic Biol Med* 2019;132:42-49.
  8. Sieber CC. Malnutrition and sarcopenia. *Aging Clin Exp Res* 2019;31(6):793-98.
  9. Cruz-Jentoft AJ, Bahat G, Bauer J, et al. Sarcopenia: revised European consensus on definition and diagnosis. *Age Ageing* 2019;48(1):16-31.
  10. Chen LK, Woo J, Assantachai P, et al. Asian Working Group for Sarcopenia: 2019 Consensus Update on Sarcopenia Diagnosis and Treatment. *J Am Med Dir Assoc* 2020;21(3):300-07.e2.
  11. Pérez-Sousa M, Pozo-Cruz JD, Cano-Gutiérrez CA, et al. High Prevalence of Probable Sarcopenia in a Representative Sample From Colombia: Implications for Geriatrics in Latin America. *J Am Med Dir Assoc* 2021;22(4):859-64.e1.
  12. Wearing J, Konings P, de Bie RA, et al. Prevalence of probable sarcopenia in community-dwelling older Swiss people - a cross-sectional study. *BMC Geriatr* 2020;20(1):307.
  13. Kim M, Won CW. Sarcopenia in Korean Community-Dwelling Adults Aged 70 Years and Older: Application of Screening and Diagnostic Tools From the Asian Working Group for Sarcopenia 2019 Update. *J Am Med Dir Assoc* 2020;21(6):752-58.
  14. Bull FC, Al-Ansari SS, Biddle S, et al. World Health Organization 2020 guidelines on physical activity and sedentary behaviour. *Br J Sports Med* 2020;54(24):1451-62.
  15. Pang BWJ, Wee SL, Lau LK, et al. Prevalence and Associated Factors of Sarcopenia in Singaporean Adults-The Yishun Study. *J Am Med Dir Assoc* 2021;22(4):885.e1-85.e10.
  16. Bhasin S, Woodhouse L, Casaburi R, et al. Older men are as responsive as young men to the anabolic effects of graded doses of testosterone on the skeletal muscle. *J Clin Endocrinol Metab* 2005;90(2):678-88.
  17. Storer TW, Basaria S, Traustadottir T, et al. Effects of Testosterone Supplementation for 3 Years on Muscle Performance and Physical Function in Older Men. *J Clin Endocrinol Metab* 2017;102(2):583-93.
  18. Shin MJ, Jeon YK, Kim IJ. Testosterone and Sarcopenia. *World J Mens Health* 2018;36(3):192-98.
  19. Cruz-Jentoft AJ, Sayer AA. Sarcopenia. *Lancet* 2019;393(10191):2636-46.
  20. Morley JE. Sarcopenia: diagnosis and treatment. *J Nutr Health Aging* 2008;12(7):452-6.
  21. Ramsey KA, Rojer AGM, D'Andrea L, et al. The association of objectively measured physical activity and sedentary behavior with skeletal muscle strength and muscle power in older adults: A systematic review and meta-analysis. *Ageing Res Rev* 2021;67:101266.
  22. Simsek H, Meseri R, Sahin S, et al. Prevalence of sarcopenia and related factors in community-dwelling elderly individuals. *Saudi Med J* 2019;40(6):568-74.
  23. Tsekoura M, Billis E, Tsepi E, et al. The Effects of Group and Home-Based Exercise Programs in Elderly with Sarcopenia: A Randomized Controlled Trial. *J Clin Med* 2018;7(12):480.
  24. Makizako H, Nakai Y, Tomioka K, et al. Effects of a Multicomponent Exercise Program in Physical Function and Muscle Mass in Sarcopenic/Pre-Sarcopenic Adults. *J Clin Med* 2020;9(5):1386.
  25. Yang L, Smith L, Hamer M. Gender-specific risk factors for incident sarcopenia: 8-year follow-up of the English longitudinal study of ageing. *J Epidemiol Community Health* 2019;73(1):86-88.
  26. Anagnostis P, Gkekakos NK, Achilla C, et al. Type 2 Diabetes Mellitus is Associated with Increased Risk of Sarcopenia: A Systematic Review and Meta-analysis. *Calcif Tissue Int* 2020;107(5):453-

- 1  
2  
3 63.  
4  
5 27. Di Bari M, van de Poll-Franse LV, Onder G, et al. Antihypertensive medications and differences in  
6 muscle mass in older persons: the Health, Aging and Body Composition Study. *J Am Geriatr Soc*  
7 2004;52(6):961-6.  
8  
9 28. Onder G, Penninx BW, Balkrishnan R, et al. Relation between use of angiotensin-converting  
10 enzyme inhibitors and muscle strength and physical function in older women: an observational  
11 study. *Lancet* 2002;359(9310):926-30.  
12  
13 29. Ata AM, Kara M, Ekiz T, et al. Reassessing Sarcopenia in Hypertension: STAR and ACE Inhibitors  
14 Excel. *Int J Clin Pract* 2021;75(3):e13800.  
15  
16 30. Tang CH. Research of Pathogenesis and Novel Therapeutics in Arthritis. *Int J Mol Sci*  
17 2019;20(7):1646.  
18  
19 31. Hitchon CA, Khan S, Elias B, et al. Prevalence and Incidence of Rheumatoid Arthritis in Canadian  
20 First Nations and Non-First Nations People: A Population-Based Study. *J Clin Rheumatol*  
21 2020;26(5):169-75.  
22  
23 32. Safiri S, Kolahi AA, Hoy D, et al. Global, regional and national burden of rheumatoid arthritis  
24 1990-2017: a systematic analysis of the Global Burden of Disease study 2017. *Ann Rheum Dis*  
25 2019;78(11):1463-71.  
26  
27 33. Zhang Q, Liu Q, Lin C, et al. The prevalence of rheumatoid arthritis in middle-aged and elderly  
28 people living in Naqu City, Tibet, Autonomous Region of China. *J Orthop Surg Res* 2020;15(1):338.  
29  
30 34. Baker JF, Von Feldt J, Mostoufi-Moab S, et al. Deficits in muscle mass, muscle density, and  
31 modified associations with fat in rheumatoid arthritis. *Arthritis Care Res (Hoboken)*  
32 2014;66(11):1612-8.  
33  
34 35. Ekici R, Erden A, Güven SC, et al. Prevalence of sarcopenia and clinical implications in patients  
35 with newly diagnosed rheumatoid arthritis. *Nutrition* 2021;90:111353.  
36  
37 36. Tekgoz E, Colak S, Ozalp Ates FS, et al. Sarcopenia in rheumatoid arthritis: Is it a common  
38 manifestation? *Int J Rheum Dis* 2020;23(12):1685-91.  
39  
40 37. Torii M, Hashimoto M, Hanai A, et al. Prevalence and factors associated with sarcopenia in patients  
41 with rheumatoid arthritis. *Mod Rheumatol* 2019;29(4):589-95.  
42  
43  
44  
45  
46  
47  
48  
49  
50  
51  
52  
53  
54  
55  
56  
57  
58  
59  
60



1  
2  
3  
4  
5  
6  
7  
8  
9  
10  
11  
12  
13  
14  
15  
16  
17  
18  
19  
20  
21  
22  
23  
24  
25  
26  
27  
28  
29  
30  
31  
32  
33  
34  
35  
36  
37  
38  
39  
40  
41  
42  
43  
44  
45  
46  
47

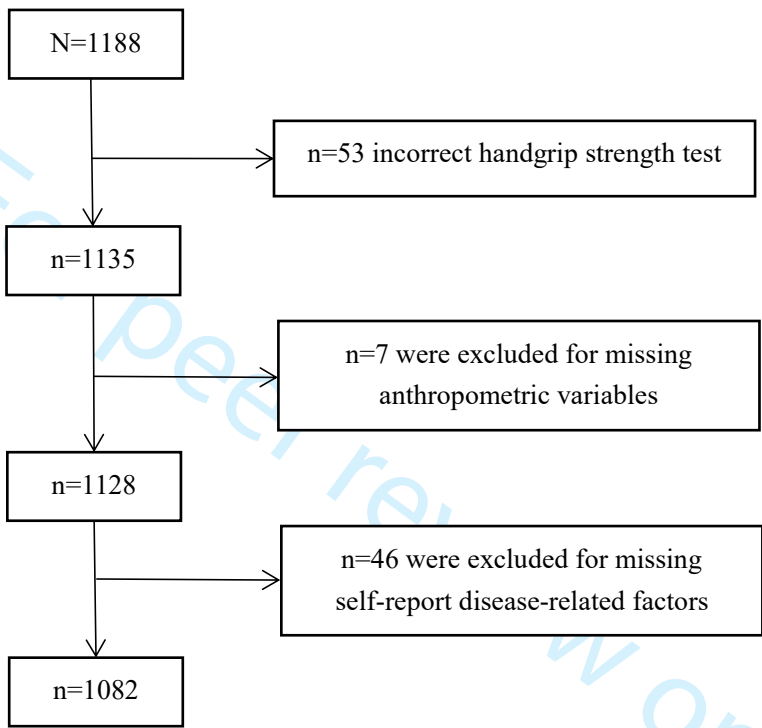

Figure 1 participation of elderly adults

# Reporting checklist for cross sectional study.

Based on the STROBE cross sectional guidelines.

## Instructions to authors

Complete this checklist by entering the page numbers from your manuscript where readers will find each of the items listed below.

Your article may not currently address all the items on the checklist. Please modify your text to include the missing information. If you are certain that an item does not apply, please write "n/a" and provide a short explanation.

Upload your completed checklist as an extra file when you submit to a journal.

In your methods section, say that you used the STROBE cross sectional reporting guidelines, and cite them as:

von Elm E, Altman DG, Egger M, Pocock SJ, Gøtzsche PC, Vandenbroucke JP. The Strengthening the Reporting of Observational Studies in Epidemiology (STROBE) Statement: guidelines for reporting observational studies.

|                           | Reporting Item                                                                                                      | Page Number |
|---------------------------|---------------------------------------------------------------------------------------------------------------------|-------------|
| <b>Title and abstract</b> |                                                                                                                     |             |
| Title                     | <a href="#">#1a</a> Indicate the study's design with a commonly used term in the title or the abstract              | 1           |
| Abstract                  | <a href="#">#1b</a> Provide in the abstract an informative and balanced summary of what was done and what was found | 1-2         |
| <b>Introduction</b>       |                                                                                                                     |             |
| Background / rationale    | <a href="#">#2</a> Explain the scientific background and rationale for the investigation being reported             | 2-3         |
| Objectives                | <a href="#">#3</a> State specific objectives, including any prespecified hypotheses                                 | 3           |
| <b>Methods</b>            |                                                                                                                     |             |

|    |                            |                      |                                                                                                                                                                                                                                                                      |                                                                                                               |
|----|----------------------------|----------------------|----------------------------------------------------------------------------------------------------------------------------------------------------------------------------------------------------------------------------------------------------------------------|---------------------------------------------------------------------------------------------------------------|
| 1  | Study design               | <a href="#">#4</a>   | Present key elements of study design early in the paper                                                                                                                                                                                                              | 3                                                                                                             |
| 2  |                            |                      |                                                                                                                                                                                                                                                                      |                                                                                                               |
| 3  |                            |                      |                                                                                                                                                                                                                                                                      |                                                                                                               |
| 4  | Setting                    | <a href="#">#5</a>   | Describe the setting, locations, and relevant dates, including periods of recruitment, exposure, follow-up, and data collection                                                                                                                                      | 3                                                                                                             |
| 5  |                            |                      |                                                                                                                                                                                                                                                                      |                                                                                                               |
| 6  |                            |                      |                                                                                                                                                                                                                                                                      |                                                                                                               |
| 7  |                            |                      |                                                                                                                                                                                                                                                                      |                                                                                                               |
| 8  |                            |                      |                                                                                                                                                                                                                                                                      |                                                                                                               |
| 9  |                            |                      |                                                                                                                                                                                                                                                                      |                                                                                                               |
| 10 | Eligibility criteria       | <a href="#">#6a</a>  | Give the eligibility criteria, and the sources and methods of selection of participants.                                                                                                                                                                             | 3                                                                                                             |
| 11 |                            |                      |                                                                                                                                                                                                                                                                      |                                                                                                               |
| 12 |                            |                      |                                                                                                                                                                                                                                                                      |                                                                                                               |
| 13 |                            |                      |                                                                                                                                                                                                                                                                      |                                                                                                               |
| 14 |                            | <a href="#">#7</a>   | Clearly define all outcomes, exposures, predictors, potential confounders, and effect modifiers. Give diagnostic criteria, if applicable                                                                                                                             | 3-4                                                                                                           |
| 15 |                            |                      |                                                                                                                                                                                                                                                                      |                                                                                                               |
| 16 |                            |                      |                                                                                                                                                                                                                                                                      |                                                                                                               |
| 17 |                            |                      |                                                                                                                                                                                                                                                                      |                                                                                                               |
| 18 |                            |                      |                                                                                                                                                                                                                                                                      |                                                                                                               |
| 19 | Data sources / measurement | <a href="#">#8</a>   | For each variable of interest give sources of data and details of methods of assessment (measurement). Describe comparability of assessment methods if there is more than one group. Give information separately for for exposed and unexposed groups if applicable. | 3-4                                                                                                           |
| 20 |                            |                      |                                                                                                                                                                                                                                                                      |                                                                                                               |
| 21 |                            |                      |                                                                                                                                                                                                                                                                      |                                                                                                               |
| 22 |                            |                      |                                                                                                                                                                                                                                                                      |                                                                                                               |
| 23 |                            |                      |                                                                                                                                                                                                                                                                      |                                                                                                               |
| 24 |                            |                      |                                                                                                                                                                                                                                                                      |                                                                                                               |
| 25 |                            |                      |                                                                                                                                                                                                                                                                      |                                                                                                               |
| 26 |                            |                      |                                                                                                                                                                                                                                                                      |                                                                                                               |
| 27 |                            |                      |                                                                                                                                                                                                                                                                      |                                                                                                               |
| 28 |                            |                      |                                                                                                                                                                                                                                                                      |                                                                                                               |
| 29 | Bias                       | <a href="#">#9</a>   | Describe any efforts to address potential sources of bias                                                                                                                                                                                                            | 3(All physical examinations were performed by trained medical students according to standardized procedures.) |
| 30 |                            |                      |                                                                                                                                                                                                                                                                      |                                                                                                               |
| 31 |                            |                      |                                                                                                                                                                                                                                                                      |                                                                                                               |
| 32 |                            |                      |                                                                                                                                                                                                                                                                      |                                                                                                               |
| 33 |                            |                      |                                                                                                                                                                                                                                                                      |                                                                                                               |
| 34 |                            |                      |                                                                                                                                                                                                                                                                      |                                                                                                               |
| 35 | Study size                 | <a href="#">#10</a>  | Explain how the study size was arrived at                                                                                                                                                                                                                            | 3                                                                                                             |
| 36 |                            |                      |                                                                                                                                                                                                                                                                      |                                                                                                               |
| 37 |                            |                      |                                                                                                                                                                                                                                                                      |                                                                                                               |
| 38 | Quantitative variables     | <a href="#">#11</a>  | Explain how quantitative variables were handled in the analyses. If applicable, describe which groupings were chosen, and why                                                                                                                                        | 4-5                                                                                                           |
| 39 |                            |                      |                                                                                                                                                                                                                                                                      |                                                                                                               |
| 40 |                            |                      |                                                                                                                                                                                                                                                                      |                                                                                                               |
| 41 |                            |                      |                                                                                                                                                                                                                                                                      |                                                                                                               |
| 42 |                            |                      |                                                                                                                                                                                                                                                                      |                                                                                                               |
| 43 | Statistical methods        | <a href="#">#12a</a> | Describe all statistical methods, including those used to control for confounding                                                                                                                                                                                    | 4-5                                                                                                           |
| 44 |                            |                      |                                                                                                                                                                                                                                                                      |                                                                                                               |
| 45 |                            |                      |                                                                                                                                                                                                                                                                      |                                                                                                               |
| 46 |                            |                      |                                                                                                                                                                                                                                                                      |                                                                                                               |
| 47 | Statistical methods        | <a href="#">#12b</a> | Describe any methods used to examine subgroups and interactions                                                                                                                                                                                                      | 4-5                                                                                                           |
| 48 |                            |                      |                                                                                                                                                                                                                                                                      |                                                                                                               |
| 49 |                            |                      |                                                                                                                                                                                                                                                                      |                                                                                                               |
| 50 |                            |                      |                                                                                                                                                                                                                                                                      |                                                                                                               |
| 51 | Statistical methods        | <a href="#">#12c</a> | Explain how missing data were addressed                                                                                                                                                                                                                              | 3(Figure 1)                                                                                                   |
| 52 |                            |                      |                                                                                                                                                                                                                                                                      |                                                                                                               |
| 53 |                            |                      |                                                                                                                                                                                                                                                                      |                                                                                                               |
| 54 | Statistical methods        | <a href="#">#12d</a> | If applicable, describe analytical methods taking account of sampling strategy                                                                                                                                                                                       | 3                                                                                                             |
| 55 |                            |                      |                                                                                                                                                                                                                                                                      |                                                                                                               |
| 56 |                            |                      |                                                                                                                                                                                                                                                                      |                                                                                                               |
| 57 |                            |                      |                                                                                                                                                                                                                                                                      |                                                                                                               |
| 58 | Statistical                | <a href="#">#12e</a> | Describe any sensitivity analyses                                                                                                                                                                                                                                    | 4-5                                                                                                           |
| 59 |                            |                      |                                                                                                                                                                                                                                                                      |                                                                                                               |
| 60 |                            |                      |                                                                                                                                                                                                                                                                      |                                                                                                               |

1 methods

2 **Results**

|    |                  |                      |                                                                                                                                                                                                                                                                                |
|----|------------------|----------------------|--------------------------------------------------------------------------------------------------------------------------------------------------------------------------------------------------------------------------------------------------------------------------------|
| 3  |                  |                      |                                                                                                                                                                                                                                                                                |
| 4  |                  |                      |                                                                                                                                                                                                                                                                                |
| 5  | Participants     | <a href="#">#13a</a> | Report numbers of individuals at each stage of study—eg numbers potentially eligible, examined for eligibility, confirmed eligible, included in the study, completing follow-up, and analysed. Give information separately for for exposed and unexposed groups if applicable. |
| 6  |                  |                      | 3                                                                                                                                                                                                                                                                              |
| 7  |                  |                      |                                                                                                                                                                                                                                                                                |
| 8  |                  |                      |                                                                                                                                                                                                                                                                                |
| 9  |                  |                      |                                                                                                                                                                                                                                                                                |
| 10 |                  |                      |                                                                                                                                                                                                                                                                                |
| 11 |                  |                      |                                                                                                                                                                                                                                                                                |
| 12 |                  |                      |                                                                                                                                                                                                                                                                                |
| 13 |                  |                      |                                                                                                                                                                                                                                                                                |
| 14 | Participants     | <a href="#">#13b</a> | Give reasons for non-participation at each stage                                                                                                                                                                                                                               |
| 15 |                  |                      | 3(Figure 1)                                                                                                                                                                                                                                                                    |
| 16 |                  |                      |                                                                                                                                                                                                                                                                                |
| 17 | Participants     | <a href="#">#13c</a> | Consider use of a flow diagram                                                                                                                                                                                                                                                 |
| 18 |                  |                      | 3(Figure 1)                                                                                                                                                                                                                                                                    |
| 19 |                  |                      |                                                                                                                                                                                                                                                                                |
| 20 | Descriptive data | <a href="#">#14a</a> | Give characteristics of study participants (eg demographic, clinical, social) and information on exposures and potential confounders. Give information separately for exposed and unexposed groups if applicable.                                                              |
| 21 |                  |                      | 5-8                                                                                                                                                                                                                                                                            |
| 22 |                  |                      |                                                                                                                                                                                                                                                                                |
| 23 |                  |                      |                                                                                                                                                                                                                                                                                |
| 24 |                  |                      |                                                                                                                                                                                                                                                                                |
| 25 |                  |                      |                                                                                                                                                                                                                                                                                |
| 26 |                  |                      |                                                                                                                                                                                                                                                                                |
| 27 | Descriptive data | <a href="#">#14b</a> | Indicate number of participants with missing data for each variable of interest                                                                                                                                                                                                |
| 28 |                  |                      | 3(Figure 1)                                                                                                                                                                                                                                                                    |
| 29 |                  |                      |                                                                                                                                                                                                                                                                                |
| 30 |                  |                      |                                                                                                                                                                                                                                                                                |
| 31 | Outcome data     | <a href="#">#15</a>  | Report numbers of outcome events or summary measures. Give information separately for exposed and unexposed groups if applicable.                                                                                                                                              |
| 32 |                  |                      | 5-8                                                                                                                                                                                                                                                                            |
| 33 |                  |                      |                                                                                                                                                                                                                                                                                |
| 34 |                  |                      |                                                                                                                                                                                                                                                                                |
| 35 |                  |                      |                                                                                                                                                                                                                                                                                |
| 36 |                  |                      |                                                                                                                                                                                                                                                                                |
| 37 | Main results     | <a href="#">#16a</a> | Give unadjusted estimates and, if applicable, confounder-adjusted estimates and their precision (eg, 95% confidence interval). Make clear which confounders were adjusted for and why they were included                                                                       |
| 38 |                  |                      | NO (The study did not adjust for confounding factors.)                                                                                                                                                                                                                         |
| 39 |                  |                      |                                                                                                                                                                                                                                                                                |
| 40 |                  |                      |                                                                                                                                                                                                                                                                                |
| 41 |                  |                      |                                                                                                                                                                                                                                                                                |
| 42 |                  |                      |                                                                                                                                                                                                                                                                                |
| 43 |                  |                      |                                                                                                                                                                                                                                                                                |
| 44 |                  |                      |                                                                                                                                                                                                                                                                                |
| 45 | Main results     | <a href="#">#16b</a> | Report category boundaries when continuous variables were categorized                                                                                                                                                                                                          |
| 46 |                  |                      | 3-4                                                                                                                                                                                                                                                                            |
| 47 |                  |                      |                                                                                                                                                                                                                                                                                |
| 48 |                  |                      |                                                                                                                                                                                                                                                                                |
| 49 | Main results     | <a href="#">#16c</a> | If relevant, consider translating estimates of relative risk into absolute risk for a meaningful time period                                                                                                                                                                   |
| 50 |                  |                      | NO                                                                                                                                                                                                                                                                             |
| 51 |                  |                      |                                                                                                                                                                                                                                                                                |
| 52 |                  |                      |                                                                                                                                                                                                                                                                                |
| 53 |                  |                      |                                                                                                                                                                                                                                                                                |
| 54 | Other analyses   | <a href="#">#17</a>  | Report other analyses done—e.g., analyses of subgroups and interactions, and sensitivity analyses                                                                                                                                                                              |
| 55 |                  |                      | 6-8(The study was divided into two subgroups: men and women)                                                                                                                                                                                                                   |
| 56 |                  |                      |                                                                                                                                                                                                                                                                                |
| 57 |                  |                      |                                                                                                                                                                                                                                                                                |
| 58 |                  |                      |                                                                                                                                                                                                                                                                                |
| 59 |                  |                      |                                                                                                                                                                                                                                                                                |
| 60 |                  |                      |                                                                                                                                                                                                                                                                                |

## Discussion

|    |                    |                     |                                                                                                                                                                  |      |
|----|--------------------|---------------------|------------------------------------------------------------------------------------------------------------------------------------------------------------------|------|
| 1  |                    |                     |                                                                                                                                                                  |      |
| 2  |                    |                     |                                                                                                                                                                  |      |
| 3  | Key results        | <a href="#">#18</a> | Summarise key results with reference to study objectives                                                                                                         | 8-10 |
| 4  |                    |                     |                                                                                                                                                                  |      |
| 5  |                    |                     |                                                                                                                                                                  |      |
| 6  |                    |                     |                                                                                                                                                                  |      |
| 7  | Limitations        | <a href="#">#19</a> | Discuss limitations of the study, taking into account sources of potential bias or imprecision. Discuss both direction and magnitude of any potential bias.      | 10   |
| 8  |                    |                     |                                                                                                                                                                  |      |
| 9  |                    |                     |                                                                                                                                                                  |      |
| 10 |                    |                     |                                                                                                                                                                  |      |
| 11 |                    |                     |                                                                                                                                                                  |      |
| 12 |                    |                     |                                                                                                                                                                  |      |
| 13 |                    |                     |                                                                                                                                                                  |      |
| 14 | Interpretation     | <a href="#">#20</a> | Give a cautious overall interpretation considering objectives, limitations, multiplicity of analyses, results from similar studies, and other relevant evidence. | 8-10 |
| 15 |                    |                     |                                                                                                                                                                  |      |
| 16 |                    |                     |                                                                                                                                                                  |      |
| 17 |                    |                     |                                                                                                                                                                  |      |
| 18 |                    |                     |                                                                                                                                                                  |      |
| 19 |                    |                     |                                                                                                                                                                  |      |
| 20 |                    |                     |                                                                                                                                                                  |      |
| 21 | Generalisability   | <a href="#">#21</a> | Discuss the generalisability (external validity) of the study results                                                                                            | 10   |
| 22 |                    |                     |                                                                                                                                                                  |      |
| 23 |                    |                     |                                                                                                                                                                  |      |
| 24 |                    |                     |                                                                                                                                                                  |      |
| 25 | <b>Other</b>       |                     |                                                                                                                                                                  |      |
| 26 | <b>Information</b> |                     |                                                                                                                                                                  |      |
| 27 |                    |                     |                                                                                                                                                                  |      |
| 28 | Funding            | <a href="#">#22</a> | Give the source of funding and the role of the funders for the present study and, if applicable, for the original study on which the present article is based    | 11   |
| 29 |                    |                     |                                                                                                                                                                  |      |
| 30 |                    |                     |                                                                                                                                                                  |      |
| 31 |                    |                     |                                                                                                                                                                  |      |
| 32 |                    |                     |                                                                                                                                                                  |      |
| 33 |                    |                     |                                                                                                                                                                  |      |
| 34 |                    |                     |                                                                                                                                                                  |      |

None The STROBE checklist is distributed under the terms of the Creative Commons Attribution License CC-BY. This checklist can be completed online using <https://www.goodreports.org/>, a tool made by the [EQUATOR Network](#) in collaboration with [Penelope.ai](#)

# BMJ Open

## Prevalence of possible sarcopenia in community-dwelling older Chinese adults: a cross-sectional study

|                                 |                                                                                                                                                                                                                                                                                                                                                                                                                    |
|---------------------------------|--------------------------------------------------------------------------------------------------------------------------------------------------------------------------------------------------------------------------------------------------------------------------------------------------------------------------------------------------------------------------------------------------------------------|
| Journal:                        | <i>BMJ Open</i>                                                                                                                                                                                                                                                                                                                                                                                                    |
| Manuscript ID                   | bmjopen-2022-067425.R1                                                                                                                                                                                                                                                                                                                                                                                             |
| Article Type:                   | Original research                                                                                                                                                                                                                                                                                                                                                                                                  |
| Date Submitted by the Author:   | 09-Nov-2022                                                                                                                                                                                                                                                                                                                                                                                                        |
| Complete List of Authors:       | Yao, Jiaqin; Bengbu Medical College, School of nursing<br>Wang, Yaoting; Bengbu Medical College, Graduate School<br>Yang, Lin; Bengbu Medical College, School of nursing<br>Ren, Mengting; Bengbu Medical College, School of nursing<br>Li, LingYan; The First Affiliated Hospital of Bengbu Medical College, Department of Hepatobiliary Surgery<br>Wang, Hongyu; Bengbu Medical College, Physical fitness center |
| <b>Primary Subject Heading</b>: | Public health                                                                                                                                                                                                                                                                                                                                                                                                      |
| Secondary Subject Heading:      | Nursing, Geriatric medicine                                                                                                                                                                                                                                                                                                                                                                                        |
| Keywords:                       | GERIATRIC MEDICINE, PREVENTIVE MEDICINE, PRIMARY CARE, PUBLIC HEALTH                                                                                                                                                                                                                                                                                                                                               |
|                                 |                                                                                                                                                                                                                                                                                                                                                                                                                    |

SCHOLARONE™  
Manuscripts



I, the Submitting Author has the right to grant and does grant on behalf of all authors of the Work (as defined in the below author licence), an exclusive licence and/or a non-exclusive licence for contributions from authors who are: i) UK Crown employees; ii) where BMJ has agreed a CC-BY licence shall apply, and/or iii) in accordance with the terms applicable for US Federal Government officers or employees acting as part of their official duties; on a worldwide, perpetual, irrevocable, royalty-free basis to BMJ Publishing Group Ltd ("BMJ") its licensees and where the relevant Journal is co-owned by BMJ to the co-owners of the Journal, to publish the Work in this journal and any other BMJ products and to exploit all rights, as set out in our [licence](#).

The Submitting Author accepts and understands that any supply made under these terms is made by BMJ to the Submitting Author unless you are acting as an employee on behalf of your employer or a postgraduate student of an affiliated institution which is paying any applicable article publishing charge ("APC") for Open Access articles. Where the Submitting Author wishes to make the Work available on an Open Access basis (and intends to pay the relevant APC), the terms of reuse of such Open Access shall be governed by a Creative Commons licence – details of these licences and which [Creative Commons](#) licence will apply to this Work are set out in our licence referred to above.

Other than as permitted in any relevant BMJ Author's Self Archiving Policies, I confirm this Work has not been accepted for publication elsewhere, is not being considered for publication elsewhere and does not duplicate material already published. I confirm all authors consent to publication of this Work and authorise the granting of this licence.

# Prevalence of possible sarcopenia in community-dwelling older Chinese adults: a cross-sectional study

Jiaqin Yao<sup>1</sup>·Yaoting Wang<sup>2</sup>·Lin Yang<sup>1</sup>·Mengting Ren<sup>1</sup>·LingYan Li<sup>3</sup>·Hongyu Wang<sup>4</sup>

<sup>1</sup>School of nursing, Bengbu Medical College, Bengbu, Anhui, China

<sup>2</sup>Graduate School of Bengbu Medical College, Bengbu, Anhui, China

<sup>3</sup>Department of Hepatobiliary Surgery, the First Affiliated Hospital of Bengbu Medical College, Bengbu, Anhui, China

<sup>4</sup>Physical fitness center, Bengbu Medical College, Bengbu, Anhui, China

**Corresponding author:** Hongyu Wang

**E-mail:** [wanghongyu81920@163.com](mailto:wanghongyu81920@163.com)

**Number of references:** 42

**Abstract count:** 284

**Word count:** 3108

## Abstract

**Objectives** To determine the prevalence of possible sarcopenia and its association with other conditions in older adults in Bengbu, China.

**Design, setting and participants** A cross-sectional study of 1082 community-dwelling Chinese people aged at least 60 years from March to June, 2022.

**Methods** Handgrip strength and information regarding associated conditions were collected. Possible sarcopenia was estimated based on handgrip strength with cut-off values (< 28 kg in men; < 18 kg in women) recommended by the Asia Working Group for Sarcopenia in 2019 (AWGS 2019). Mann-Whitney U tests, Chi-square tests and binary logistic regression analyses were used to explore relationships between possible sarcopenia and associated conditions.

**Results** Possible sarcopenia was more prevalent in men (52.79%, n = 246, age 79.43 ± 7.33 years among men with possible sarcopenia) than in women (44.48%, n = 274, age 78.90 ± 7.71 years among women with possible sarcopenia). In men, possible sarcopenia positively correlated with high age [odds ratio (OR) = 2.658, 95% confidence interval (CI) 1.758-4.019], physical inactivity (OR = 2.779, 95% CI 1.646-4.691) and diabetes (OR = 4.269, 95% CI 2.397-7.602), and negatively



with hypertension (OR = 0.586, 95% CI 0.384-0.893). The risk of possible sarcopenia in men decreased by 12.6% for every 1 kg/m<sup>2</sup> increase of body mass index (BMI) (OR = 0.874, 95% CI 0.817-0.935). In women, possible sarcopenia positively correlated with high age (OR = 3.821, 95% CI 2.677-5.455), physical inactivity (OR = 2.185, 95% CI 1.488-3.210) and arthritis (OR = 2.076, 95% CI 1.411-3.056).

**Conclusion** Possible sarcopenia is prevalent in older adults and the factors affecting possible sarcopenia are different in men and women. Health education about these target factors can be considered as a potential measure to prevent possible sarcopenia.

#### **Strengths and limitations of this study**

- ⇒ This study used the concept of low handgrip strength (< 28 kg in men; < 18 kg in women) in the latest guideline (AWGS 2019) to assess possible sarcopenia.
- ⇒ The grouping of subjects by sex permitted additional insight into risk factors.
- ⇒ Because it was a cross-sectional study, cause-effect relationships could not be determined.

#### **Introduction**

As an independent disease in the 10<sup>th</sup> edition of International Classification of Diseases, sarcopenia has become an important public health issue [1]. Sarcopenia is a geriatric syndrome characterized by loss of muscle mass and muscle strength and decreased physical function [2]. Substantial evidence suggests that sarcopenia has an important impact on the health of older adults, and it often is associated with adverse outcomes such as illness, falls, reduced quality of life and even death [3]. Sarcopenia is not only associated with aging, but it can also result from a combination of chronic diseases including respiratory disease [4], diabetes [5] and cancer [6]. It is associated with environmental factors, and the risk of developing sarcopenia can be lowered by changes to physical activity and diet [7,8].

In order to help predict the occurrence of sarcopenia in at-risk populations, the concept of “probable sarcopenia” was introduced in the guideline of the European Working Group on Sarcopenia in Older People in 2018 (EWGSOP2). The guideline considered low muscle strength to be an indicator of probable sarcopenia [9]. In 2019, the Asia Working Group for Sarcopenia (AWGS) updated its guideline first issued in 2014 and proposed the concept of “possible sarcopenia”, which was defined as the existence of low muscle strength with or without reduced physical performance

1  
2  
3  
4 [10]. Both guidelines recommend using handgrip strength to assess muscle strength, but there are  
5 slight differences in threshold values used for diagnosis [9 10].  
6

7  
8 The uses of these two international guidelines lead to differences in the reported prevalence of  
9 possible sarcopenia among different populations. One study determined that the prevalence of  
10 probable sarcopenia in a group of subjects in a Colombian community with a mean age  $70.4 \pm 7.8$   
11 years was 46.5% based on threshold values from EWGSOP2 [11]. On the other hand, the values of  
12 the prevalence of probable sarcopenia in Swiss women (age  $84.1 \pm 5.7$  years) and men (age  $82.6 \pm$   
13  $5.2$  years) were determined to be 26.3% and 28.0%, respectively [12]. In a South Korean study, Kim  
14 et al used the cut-off values recommended by the AWGS 2019 to screen for the possible sarcopenia  
15 and found a prevalence of 20.1% in men (age  $76.4 \pm 3.9$  years) and a prevalence of 29.2% in women  
16 (age  $75.5 \pm 3.9$  years) [13].  
17  
18  
19  
20  
21  
22  
23  
24

25 Despite renewed interest in the condition, few studies have been performed to investigate the  
26 prevalence of possible sarcopenia and its relationship to various factors in Chinese populations.  
27 Therefore, the aims of this study were (1) to determine the prevalence of possible sarcopenia using  
28 the latest guideline (AWGS 2019) in a sample of older adults, aged 60 years and above, in Bengbu,  
29 China and (2) to explore the relationship between possible sarcopenia and its associated factors.  
30  
31  
32  
33  
34

## 35 **Methods**

### 36 **Sample**

37  
38 This was a cross-sectional, community-based study conducted in the city of Bengbu, China,  
39 from March, 2022, through June, 2022. Inclusion criteria for study participants were aged at least  
40 60 years, ability to understand relevant issues and ability to provide informed consent. Exclusion  
41 criteria were inability to complete the handgrip strength measurement and lack of complete medical  
42 or demographic data.  
43  
44  
45  
46  
47

48 The minimum sample size was calculated to be 792 elderly individuals, assuming a prevalence  
49 of possible sarcopenia of 24.6% [13], at a 3% error rate and 95% confidence interval. After  
50 considering the design effect as 1.5, the aim was to access a minimum sample size of 1188  
51 individuals. Multi-stage random cluster sampling and random numbers table were conducted. First,  
52 all the streets were listed and 7 streets were randomly grouped. Then, 3 communities were randomly  
53 grouped into each street. Finally, we contacted the leaders of the selected communities, and  
54  
55  
56  
57  
58  
59  
60

1  
2  
3  
4 randomly recruited residents aged 60 years and above in each community to travel to nearby stalls  
5 for assessment. As a result, the final sample included 1082 elderly participants for a 91.08%  
6 response rate (Figure 1). Each participant signed an informed consent form. The Ethics Committee  
7 of Bengbu Medical College approved the study protocol (Anhui, China; no.2018045).  
8  
9

### 10 **Patient and public involvement**

11  
12 The older adults were not involved in the design, conduct, reporting or dissemination plans of  
13 our research.  
14

### 15 **Anthropometric measurements**

16  
17 All physical examinations were performed by trained medical students according to  
18 standardized procedures. Height and body weight were measured with a steel measuring tape and  
19 an electronic scale, respectively. BMI was calculated as the weight in kilograms divided by the  
20 square of the height in meters. Waist circumference (WC) was measured from the middle point  
21 between the lower border of the rib cage and the iliac crest midaxillary at the end of a normal  
22 expiration with a soft measuring tape.  
23  
24  
25  
26  
27  
28  
29

### 30 **Assessment of possible sarcopenia**

31  
32 AWGS criteria (2019) define possible sarcopenia as the incidence of low muscle strength with  
33 or without reduced physical performance, therefore, in this study, low muscle strength was the only  
34 criterion used to define possible sarcopenia. Low muscle strength was defined as a handgrip strength  
35 of less than 28 kg in men and less than 18 kg in women. Handgrip strength was measured with an  
36 electronic hand dynamometer (EH101, <https://www.senssun.com>). Prior to use, the dynamometer  
37 was calibrated according to the manufacturer's instructions. Each participant was asked to hold the  
38 dynamometer with the dominant hand with as much force as possible for 3 s. This process was  
39 repeated three times with 30 s between each trial, and the handgrip strength was taken as the  
40 maximum value from these three trials [10].  
41  
42  
43  
44  
45  
46  
47  
48  
49

### 50 **Measurement of potential associated factors**

51  
52 Participants were sorted into two groups based on WHO age classification criteria: one group  
53 included participants that were aged 60 to 74 years and the other group included participants who  
54 were aged at least 75 years. Participants' level of physical activity was determined using self-  
55 reported values. According to the latest *World Health Organization 2020 Guidelines on Physical*  
56 *Activity and Sedentary Behavior* [14], physical inactivity was defined as engagement in less than 150  
57  
58  
59  
60

minutes per week of moderate exercise, such as brisk walking, jogging or dancing, and the time of high intensity physical activity was multiplied by 2 to be translated into the time of moderate physical activity. Disease-related factors were assessed with a survey that asked the participants if they had been medically diagnosed with cancer, heart disease, hypertension, hyperlipidemia, diabetes, respiratory diseases, arthritis, or pain in the waist or lower extremities.

### Statistical analysis

SPSS 25.0 software (IBM, Armonk, NY, USA) was utilized for data analyses. Continuous variables were expressed as mean  $\pm$  SD. Categorical variables were expressed as frequencies and percentages. The normality of the variables was verified using Kolmogorov-Smirnov tests. The male and female samples were divided into two groups: no sarcopenia (normal handgrip strength) or possible sarcopenia (weak handgrip strength:  $< 28$  kg in men;  $< 18$  kg in women). Student's *t*-tests were applied to identify significant differences in normally distributed of continuous variables, while Mann-Whitney *U* tests were used for comparison of non-normally distributed of continuous variables between groups. The significance of differences in baseline characteristics were examined using chi-squared tests for categorical variables. The associated factors [age group, WC, BMI, physical inactivity, cancer, heart diseases, hypertension, hyperlipidemia, diabetes, respiratory diseases, arthritis, pain in the waist or lower extremities] that were determined to reach the level of significance ( $p < 0.05$ ) were included as independent variables in separate binary logistic regression analysis models for males and females, with possible sarcopenia as the dependent variable.

### Results

Data on handgrip strength and anthropometric measures were collected from 1,082 adults aged 60 years and over ( $n = 466$  men,  $n = 616$  women; mean age  $76.62 \pm 7.11$  years). Of the participants, 484 (44.73%) were aged from 60 to 74 years, and 598 (55.27%) were aged at least 75 years.

Possible sarcopenia was determined according to the AWGS 2019 guidelines with gender-specific handgrip strength cut-off values. Of the 466 male participants, possible sarcopenia was identified in 246 (52.79%). Of the 616 female participants, possible sarcopenia was identified in 274 (44.48%). In both men and women, the majority of participants identified as having possible sarcopenia were aged 75 years and over.

Height and weight were significantly lower in the possible sarcopenia group than in the no

sarcopenia group (both  $p < 0.05$ ). Among male participants, BMI was significantly lower in the possible sarcopenia group than in the group of no sarcopenia ( $p < 0.05$ ), but there was no statistically significant difference in BMI among female participants ( $p > 0.05$ ). Moreover, the possible sarcopenia group had a great number of participants who were classified as physically inactive (Table 1).

In male participants, older adults with possible sarcopenia were significantly more likely than those without possible sarcopenia to have developed diabetes (22.76% vs 11.82%;  $p < 0.05$ ) and respiratory diseases (9.76% vs 3.64%;  $p < 0.05$ ). Conversely, participants with possible sarcopenia were significantly less likely to have developed hypertension (45.93% vs 57.73%;  $p < 0.05$ ). In female participants, older adults with possible sarcopenia were significantly more likely than those without possible sarcopenia to have developed arthritis (47.81% vs 30.41%;  $p < 0.05$ ), and pain in the waist or lower extremities (61.68% vs 53.80%;  $p < 0.05$ ) (Table 1).

Table 1 Characteristics of participants with or without possible sarcopenia

|                               | Overall sample<br>(n = 1082) | Men, n = 466 (43.07%) |                   |         | Women, n=616 (56.93%) |                  |         |
|-------------------------------|------------------------------|-----------------------|-------------------|---------|-----------------------|------------------|---------|
|                               |                              | Possible sarcopenia   | No sarcopenia     | P value | Possible sarcopenia   | No sarcopenia (n | P value |
|                               |                              | (n = 246; 52.79%)     | (n = 220; 47.21%) |         | (n = 274; 44.48%)     | = 342; 55.52%)   |         |
| Age (years)                   | 76.62 ± 7.11                 | 79.43 ± 7.33          | 74.27 ± 4.92      | < 0.001 | 78.90 ± 7.71          | 74.29 ± 6.31     | < 0.001 |
| Age group (n, %)              |                              |                       |                   |         |                       |                  |         |
| 60-74 years                   | 484 (44.73)                  | 78 (31.71)            | 122 (55.45)       | < 0.001 | 82 (29.93)            | 202 (59.06)      | < 0.001 |
| ≥ 75 years                    | 598 (55.27)                  | 168 (68.29)           | 98 (44.55)        |         | 192 (70.07)           | 140 (40.94)      |         |
| Height (cm)                   | 158.31 ± 9.28                | 162.64 ± 6.39         | 166.11 ± 10.02    | < 0.001 | 151.00 ± 6.92         | 156.04 ± 6.31    | < 0.001 |
| Weight (kg)                   | 63.42 ± 12.27                | 64.61 ± 10.12         | 71.80 ± 10.14     | < 0.001 | 56.96 ± 10.55         | 62.35 ± 12.95    | < 0.001 |
| WC (cm)                       | 90.83 ± 9.95                 | 91.26 ± 10.01         | 91.95 ± 7.92      | 0.204   | 89.83 ± 10.76         | 90.59 ± 10.35    | 0.553   |
| handgrip strength (kg)        | 22.91 ± 8.57                 | 21.49 ± 5.21          | 35.42 ± 5.11      | < 0.001 | 13.85 ± 3.72          | 23.14 ± 4.13     | < 0.001 |
| BMI (kg/m <sup>2</sup> )      | 25.40 ± 6.75                 | 24.42 ± 3.49          | 26.62 ± 11.42     | < 0.001 | 25.00 ± 4.68          | 25.63 ± 5.72     | 0.428   |
| Physical inactivity<br>(n, %) | 270 (24.95)                  | 71 (28.86)            | 28 (12.73)        | < 0.001 | 97 (35.40)            | 74 (21.64)       | < 0.001 |
| Cancer (n, %)                 | 18 (1.66)                    | 6 (2.44)              | 2 (0.91)          | 0.204   | 6 (2.19)              | 4 (1.17)         | 0.319   |

|                                                     |             |             |             |       |             |             |         |
|-----------------------------------------------------|-------------|-------------|-------------|-------|-------------|-------------|---------|
| Heart diseases (n, %)                               | 345 (31.89) | 70 (28.45)  | 76 (34.55)  | 0.157 | 80 (29.20)  | 119 (34.80) | 0.140   |
| Hypertension (n, %)                                 | 599 (55.36) | 113 (45.93) | 127 (57.73) | 0.011 | 170 (62.04) | 189 (55.26) | 0.090   |
| Hyperlipidemia (n, %)                               | 208 (19.22) | 46 (18.70)  | 44 (20.00)  | 0.723 | 48 (17.52)  | 70 (20.47)  | 0.355   |
| Diabetes (n, %)                                     | 201 (18.58) | 56 (22.76)  | 26 (11.82)  | 0.002 | 54 (19.71)  | 65 (19.01)  | 0.836   |
| Respiratory diseases<br>(n, %)                      | 93 (8.60)   | 24 (9.76)   | 8 (3.64)    | 0.009 | 32 (11.68)  | 29 (8.48)   | 0.186   |
| Arthritis (n, %)                                    | 349 (32.26) | 59 (23.98)  | 55 (25.00)  | 0.799 | 131 (47.81) | 104 (30.41) | < 0.001 |
| Pain in the waist or<br>lower extremities<br>(n, %) | 534 (49.35) | 93 (37.80)  | 89 (40.45)  | 0.499 | 169 (61.68) | 184 (53.80) | 0.049   |

WC, waist circumference; BMI, body mass index

For male participants, a binary logistic regression analysis showed that the significantly correlating variables age, BMI, physical inactivity, hypertension, diabetes and respiratory diseases explained whether a participant had possible sarcopenia or not to 23.6% (Nagelkerke's  $R^2 = 0.236$ , Chi-squared (6) = 90.767,  $p < 0.0001$ ), and the percentage accuracy in classification was 65.9%. Higher age (OR = 2.658, 95% CI 1.758-4.019), physical inactivity (OR = 2.779, 95% CI 1.646-4.691) and diabetes (OR = 4.269, 95% CI 2.397-7.602) were risk factors for possible sarcopenia. Conversely, hypertension (OR = 0.586, 95% CI 0.384-0.893) was a protective factor for possible sarcopenia. Moreover, the risk of possible sarcopenia decreased by 12.6% for every 1 kg/m<sup>2</sup> increase of BMI (OR = 0.874, 95% CI 0.817-0.935). Respiratory disease did not have a significant association with possible sarcopenia (Table 2).

For female participants, a binary logistic regression analysis showed that the significantly correlating variables age, physical inactivity, arthritis and pain in lower extremities or waist explained whether a participant had possible sarcopenia or not to 18.5% (Nagelkerke's  $R^2 = 0.185$ , Chi-squared (4) = 91.593,  $p < 0.0001$ ), and the percentage accuracy in classification was 67.4%. Higher age (OR = 3.821, 95% CI 2.677-5.455), physical inactivity (OR = 2.185, 95% CI 1.488-3.210) and arthritis (OR = 2.076, 95% CI 1.411- 3.056) were risk factors for possible sarcopenia. However, pain in the lower extremities or waist did not have a significant association with possible sarcopenia (Table 3).

Table2 Binary logistic regression analysis of possible sarcopenia category by correlated variables

in men

| Variables                                    | Wald   | Degrees of freedom | P value | OR     | 95% CI |       |
|----------------------------------------------|--------|--------------------|---------|--------|--------|-------|
|                                              |        |                    |         |        | Lower  | Upper |
| Age group ( $\geq 75$ years vs. 60-74 years) | 21.478 | 1                  | < 0.001 | 2.658  | 1.758  | 4.019 |
| Physical inactivity (yes vs. no)             | 14.640 | 1                  | < 0.001 | 2.779  | 1.646  | 4.691 |
| Hypertension (yes vs. no)                    | 6.174  | 1                  | 0.013   | 0.586  | 0.384  | 0.893 |
| Diabetes (yes vs. no)                        | 24.289 | 1                  | < 0.001 | 4.269  | 2.397  | 7.602 |
| Respiratory diseases (yes vs. no)            | 2.659  | 1                  | 0.103   | 2.169  | 0.855  | 5.501 |
| BMI                                          | 15.378 | 1                  | < 0.001 | 0.874  | 0.817  | 0.935 |
| Constant                                     | 9.647  | 1                  | 0.002   | 14.990 |        |       |

Age groups, physical inactivity, hypertension, diabetes, respiratory diseases and BMI were simultaneously included in the model.

OR, odds ratio; 95% CI, confidence interval; BMI, body mass index

Table3 Binary logistic regression analysis of possible sarcopenia category by correlated variables

in women

| Variables                                           | Wald   | Degrees of freedom | P value | OR    | 95% CI |       |
|-----------------------------------------------------|--------|--------------------|---------|-------|--------|-------|
|                                                     |        |                    |         |       | Lower  | Upper |
| Age group ( $\geq 75$ years vs. 60-74 years)        | 54.498 | 1                  | < 0.001 | 3.821 | 2.677  | 5.455 |
| Physical inactivity (yes vs. no)                    | 15.874 | 1                  | < 0.001 | 2.185 | 1.488  | 3.210 |
| Arthritis (yes vs. no)                              | 13.733 | 1                  | < 0.001 | 2.076 | 1.411  | 3.056 |
| Pain in the waist or lower extremities (yes vs. no) | 0.756  | 1                  | 0.384   | 1.186 | 0.807  | 1.742 |
| Constant                                            | 64.394 | 1                  | < 0.001 | 0.207 |        |       |

Age groups, physical inactivity, arthritis and pain in the waist or lower extremities were simultaneously included in the model.

OR, odds ratio; 95% CI, confidence interval

## Discussion

We investigated the prevalence of possible sarcopenia and its correlation with associated factors. We found that possible sarcopenia has a high prevalence in the community of Bengbu. The prevalence of 48.06% is higher than the prevalence of 38.5% found in adults in another study conducted in China<sup>[15]</sup>. The reason for this discrepancy may be that the population in our study was

1  
2  
3  
4 older than the population (age  $68.13 \pm 6.46$  years) in the previous study. It should also be noted that  
5 the prevalence identified in our study is higher than that found in another study of similarly aged  
6 subjects (age  $75.9 \pm 3.9$ ) from the Asian country of South Korea [13]. The reason for this discrepancy  
7 may be that the South Korean study used the calf circumference, SARC-F or SARC-CalF scales to  
8 screen participants prior to administering the handgrip strength test, whereas the present study used  
9 handgrip strength test directly to identify possible sarcopenia. This difference suggests that many  
10 of the older adults in South Korea who were not identified as candidates for the handgrip strength  
11 test according to calf circumference, SARC-F or SARC-CalF scale criteria may have had lower  
12 handgrip strengths indicative of possible sarcopenia. Therefore, direct measurement of handgrip  
13 strength has important clinical value.  
14  
15  
16  
17  
18  
19  
20  
21  
22

23 Our study found that possible sarcopenia is more common among men than women (52.79%  
24 in men and 44.48% in women), as did a study performed by Wearing et al [12] (28% in men and 26.3%  
25 in women). Interestingly, Pang et al [16] found that the prevalence of possible sarcopenia in men  
26 between the ages of 20 and 60 years (13%) is lower than that in women in the same age group  
27 (14.2%), but the relative prevalence in older adults over the age of 60 years is reversed (33.7% in  
28 men and 30.9% in women). A possible mechanism of pathogenesis of leading to differences in  
29 possible sarcopenia in men and women involves testosterone. Testosterone plays an important role  
30 in the development and maintenance of muscle mass and function and can increase muscle mass  
31 and muscle strength [17 18]. Testosterone in men declines at a rate of 1% per year after the age of 30,  
32 and 40 to 70% of men over the age of 70 have low testosterone levels [19]. This may be one of the  
33 important reasons why the prevalence rate of older men is higher than that of women.  
34  
35  
36  
37  
38  
39  
40  
41  
42  
43  
44

45 We found that high age and physical inactivity are positively associated with the prevalence of  
46 possible sarcopenia. This result is consistent with other studies that have identified the main cause  
47 of possible sarcopenia as age-related loss of muscle strength. A study of subjects from a Chinese  
48 population identified a 50.8% decrease in right handgrip strength in men aged 85 to 90 years  
49 compared to men aged 45 to 50 years and a 55.0% decrease in right handgrip strength in women  
50 [20]. Several studies have reported that physical inactivity is the primary risk factor for decreased  
51 muscle strength [21 22]. Tsekoura et al [23] and Makizako et al [24] confirmed that exercise intervention  
52 for older adults slows the decline of muscle strength with age. Nearly a quarter of the participants  
53  
54  
55  
56  
57  
58  
59  
60



1  
2  
3  
4 were physically inactive, which is another potential explanation for the high prevalence of possible  
5 sarcopenia observed in this study. The correlations of age and physical inactivity with possible  
6 sarcopenia suggests that encouraging more physical activity in older adults is particularly important  
7 to prevent or delay the onset and progression of sarcopenia.  
8  
9

10  
11 The relationships of various factors to possible sarcopenia differed between the sexes. In men,  
12 diabetes was found to have a strong correlation with possible sarcopenia. Diabetes was associated  
13 with a 4.269-fold increase in the risk of possible sarcopenia in older men, but there was no  
14 correlation found in older women. Likewise, a longitudinal study in the United Kingdom showed  
15 an increase in probable sarcopenia after eight years in men with diabetes, but not in women [25].  
16 However, Anagnostis et al [26] reported that muscle strength was significantly lower in patients with  
17 type 2 diabetes mellitus than in subjects without diabetes, but a significant relationship only existed  
18 in women [standardized mean difference (SMD) for women – 0.52, 95% CI – 0.98 to – 0.06,  $p =$   
19 0.02; SMD for men – 0.42, 95% CI – 0.97 to 0.13,  $p = 0.13$ ]. Thus, it is necessary to further  
20 investigate the existence of gender differences in the relationship between diabetes and possible  
21 sarcopenia.  
22  
23

24  
25 We also found that hypertension is a protective factor for possible sarcopenia in men. Several  
26 studies showed that patients taking angiotensin converting enzyme inhibitors (ACEI) as therapy for  
27 hypertension had higher muscle strength than patients without hypertension and patients with  
28 hypertension who were not taking ACEI [27 28]. Similarly, Ata et al pointed that ACEI therapy seems  
29 to have favourable effects on both hypertension and sarcopenia [29]. The treatment reduces  
30 inflammation and endothelial dysfunction in hypertension [30] and may improve skeletal muscle  
31 function by increasing muscle blood flow and glucose delivery [31]. Although more than half of the  
32 participants in our study were hypertensive, the medications they were taking were not investigated,  
33 so the relationship between hypertensive medications and possible sarcopenia will be further  
34 explored in later studies.  
35  
36

37  
38 We also found that the risk of possible sarcopenia in men decreased by 12.6% for every 1  
39 kg/m<sup>2</sup> increase of BMI. A study based on a Korean population showed that BMI was positively  
40 correlated with handgrip strength in both men and women, and the correlation was higher in men ( $\beta$   
41 = 0.976,  $r = 0.378$ ) than in women ( $\beta = 0.190$ ,  $r = 0.134$ ) [32]. Older adults with low BMI values may  
42  
43  
44  
45  
46  
47  
48  
49  
50  
51  
52

1  
2  
3  
4 be underweight and at risk of malnutrition. For example, Granic et al [33] found that a low protein  
5 intake (<1g/kg) was associated with lower handgrip strength. A systematic review and meta-  
6 analysis showed that multi-nutrients significantly improved handgrip strength (n = 6 studies; 780  
7 participants; SMD = 0.41; 95%CI: 0.06 to 0.76;  $I^2 = 79\%$ ), and nutritional supplementations with  
8 protein or amino acids was also associated with improved handgrip strength (n = 7 studies; 535  
9 participants; SMD = 0.24; 95%CI: 0.07 to 0.41;  $I^2 = 16\%$ ) [34]. Therefore, early nutritional  
10 intervention for older patients with possible sarcopenia is an important strategy in decreasing the  
11 risk of progression to sarcopenia.  
12  
13  
14  
15  
16  
17  
18

19 In our study, women with arthritis were found to have a higher risk of possible sarcopenia.  
20 There are more than 100 types of arthritis. Rheumatoid arthritis (RA) is the most common form, but  
21 other common types of arthritis include osteoarthritis and inflammatory arthritis [35]. Several studies  
22 have shown that women are more likely to be diagnosed with RA than men [36-38], and adults with  
23 RA tend to have lower muscle masses or strengths compared to adults without RA [39-41]. Notably,  
24 RA can cause joint pain and deformity, therefore, it is unclear to what extent decreases in handgrip  
25 strength in patients with RA reflect true low muscle strength and how much of the limited handgrip  
26 strength may be secondary to pain or deformity [42]. Thence, other measurements should be  
27 considered to assess the possible sarcopenia in arthritis adults.  
28  
29  
30  
31  
32  
33  
34  
35

36 The major strength of our study is that it assessed possible sarcopenia using the latest guideline  
37 (AWGS 2019) and analyzed two subgroups based on gender. However, several limitations should  
38 be mentioned. First, this study focused solely on a population of older adults in Bengbu, so findings  
39 may not be generalizable to other populations. Second, we did not investigate nutritional factors that  
40 may be related to possible sarcopenia; a nutrition survey will be added in future studies.  
41  
42  
43  
44  
45

## 46 **Conclusions**

47  
48 The prevalence of possible sarcopenia in older adults in Bengbu is high, and it is more common  
49 among men than women. Men with high age, physical inactivity, diabetes and no hypertension had  
50 a higher prevalence of possible sarcopenia. And BMI was also found to be an independent risk  
51 factor for possible sarcopenia in men. Women with high age, physical inactivity and arthritis had a  
52 higher prevalence of possible sarcopenia. Community health care institutions should pay attention  
53  
54  
55  
56  
57  
58  
59  
60

1  
2  
3  
4 to the screening of possible sarcopenia, especially among older men. Targeted health education  
5 should also be carried out to encourage older adults to actively participate in physical exercise.

6  
7 **Acknowledgements** We want to thank all the participants involved in the study. We would also like  
8 to thank the hardworking research personnel involved in the data collection making this study  
9 possible.  
10

11  
12  
13 **Funding** This work was supported in part by Major project of Humanities and Social Sciences in  
14 Universities of Anhui Province (SK2020ZD32), the 512 Talent Cultivation Program of Bengbu  
15 Medical College (by51201208) and the Graduate Research Innovation Plan of Bengbu Medical  
16 College in 2021 (Byycx21023).  
17  
18

19  
20  
21 **Conflict of interest** The authors have no conflicts of interest.  
22

23 **Ethics approval** Ethical approval was obtained by the ethics committees of Bengbu Medical  
24 College (Anhui, China; no.2018045).  
25

26  
27 **Statement of human participants and/or animals** All the procedures performed in this study  
28 involving human participants were in accordance with the ethical standards of the institutional and  
29 national research committee and with the 1964 Declaration of Helsinki and its later amendments.  
30

31  
32  
33 **Informed consent** All individual participants in the research gave their informed consent.  
34

35 **Data availability statement** The data are held at Physical fitness center of Bengbu Medical College.  
36

37 **Author contributions** Jiaqin Yao: conceptualization, methodology, data collection, writing,  
38 investigation, statistical analysis. Yaoting Wang: data collection, methodology, writing,  
39 investigation. Lin Yang: data collection, writing. Mengting Ren: data collection, writing. Lingyan  
40 Li: writing. Hongyu Wang: conceptualization, methodology, statistical analysis.  
41  
42  
43

#### 44 **References**

- 45  
46 [1] Cao L, Morley JE. Sarcopenia Is Recognized as an Independent Condition by an International  
47 Classification of Disease, Tenth Revision, Clinical Modification (ICD-10-CM) Code. *J Am*  
48 *Med Dir Assoc* 2016;17(8):675-7.  
49  
50  
51 [2] Cruz-Jentoft AJ, Baeyens JP, Bauer JM, et al. Sarcopenia: European consensus on definition  
52 and diagnosis: Report of the European Working Group on Sarcopenia in Older People. *Age*  
53 *Ageing* 2010;39(4):412-23.  
54  
55  
56 [3] Keller K. Sarcopenia. *Wien Med Wochenschr* 2019;169(7-8):157-72.  
57  
58  
59  
60

- 1  
2  
3  
4 [4] Bone AE, Heggul N, Kon S, et al. Sarcopenia and frailty in chronic respiratory disease. *Chron*  
5 *Respir Dis* 2017;14(1):85-99.  
6  
7 [5] Izzo A, Massimino E, Riccardi G, et al. A Narrative Review on Sarcopenia in Type 2 Diabetes  
8 Mellitus: Prevalence and Associated Factors. *Nutrients* 2021;13(1):183.  
9  
10 [6] Pamoukdjian F, Bouillet T, Lévy V, et al. Prevalence and predictive value of pre-therapeutic  
11 sarcopenia in cancer patients: A systematic review. *Clin Nutr* 2018;37(4):1101-13.  
12  
13 [7] Nascimento CM, Ingles M, Salvador-Pascual A, et al. Sarcopenia, frailty and their prevention  
14 by exercise. *Free Radic Biol Med* 2019;132:42-49.  
15  
16 [8] Sieber CC. Malnutrition and sarcopenia. *Ageing Clin Exp Res* 2019;31(6):793-98.  
17  
18 [9] Cruz-Jentoft AJ, Bahat G, Bauer J, et al. Sarcopenia: revised European consensus on definition  
19 and diagnosis. *Age Ageing* 2019;48(1):16-31.  
20  
21 [10] Chen LK, Woo J, Assantachai P, et al. Asian Working Group for Sarcopenia: 2019 Consensus  
22 Update on Sarcopenia Diagnosis and Treatment. *J Am Med Dir Assoc* 2020;21(3):300-07.e2.  
23  
24 [11] Pérez-Sousa M, Pozo-Cruz JD, Cano-Gutiérrez CA, et al. High Prevalence of Probable  
25 Sarcopenia in a Representative Sample From Colombia: Implications for Geriatrics in Latin  
26 America. *J Am Med Dir Assoc* 2021;22(4):859-64.e1.  
27  
28 [12] Wearing J, Konings P, de Bie RA, et al. Prevalence of probable sarcopenia in community-  
29 dwelling older Swiss people - a cross-sectional study. *BMC Geriatr* 2020;20(1):307.  
30  
31 [13] Kim M, Won CW. Sarcopenia in Korean Community-Dwelling Adults Aged 70 Years and  
32 Older: Application of Screening and Diagnostic Tools From the Asian Working Group for  
33 Sarcopenia 2019 Update. *J Am Med Dir Assoc* 2020;21(6):752-58.  
34  
35 [14] Bull FC, Al-Ansari SS, Biddle S, et al. World Health Organization 2020 guidelines on physical  
36 activity and sedentary behaviour. *Br J Sports Med* 2020;54(24):1451-62.  
37  
38 [15] Wu X, Li X, Xu M, et al. Sarcopenia prevalence and associated factors among older Chinese  
39 population: Findings from the China Health and Retirement Longitudinal Study. *PLoS One*  
40 2021;16(3):e0247617.  
41  
42 [16] Pang BWJ, Wee SL, Lau LK, et al. Prevalence and Associated Factors of Sarcopenia in  
43 Singaporean Adults-The Yishun Study. *J Am Med Dir Assoc* 2021;22(4):885.e1-85.e10.  
44  
45 [17] Bhasin S, Woodhouse L, Casaburi R, et al. Older men are as responsive as young men to the  
46  
47  
48  
49  
50  
51  
52  
53  
54  
55  
56  
57  
58  
59  
60

- 1  
2  
3  
4 anabolic effects of graded doses of testosterone on the skeletal muscle. *J Clin Endocrinol*  
5  
6 *Metab* 2005;90(2):678-88.
- 7  
8 [18] Storer TW, Basaria S, Traustadottir T, et al. Effects of Testosterone Supplementation for 3  
9  
10 Years on Muscle Performance and Physical Function in Older Men. *J Clin Endocrinol Metab*  
11  
12 2017;102(2):583-93.
- 13  
14 [19] Shin MJ, Jeon YK, Kim IJ. Testosterone and Sarcopenia. *World J Mens Health*  
15  
16 2018;36(3):192-98.
- 17  
18 [20] Huang G, Wu L. Handgrip Strength References for Middle-Age and Older Chinese Individuals.  
19  
20 *J Am Med Dir Assoc* 2020;21(2):286-87.
- 21  
22 [21] Ramsey KA, Rojer AGM, D'Andrea L, et al. The association of objectively measured physical  
23  
24 activity and sedentary behavior with skeletal muscle strength and muscle power in older adults:  
25  
26 A systematic review and meta-analysis. *Ageing Res Rev* 2021;67:101266.
- 27  
28 [22] Simsek H, Meseri R, Sahin S, et al. Prevalence of sarcopenia and related factors in community-  
29  
30 dwelling elderly individuals. *Saudi Med J* 2019;40(6):568-74.
- 31  
32 [23] Tsekoura M, Billis E, Tsepis E, et al. The Effects of Group and Home-Based Exercise  
33  
34 Programs in Elderly with Sarcopenia: A Randomized Controlled Trial. *J Clin Med*  
35  
36 2018;7(12):480.
- 37  
38 [24] Makizako H, Nakai Y, Tomioka K, et al. Effects of a Multicomponent Exercise Program in  
39  
40 Physical Function and Muscle Mass in Sarcopenic/Pre-Sarcopenic Adults. *J Clin Med*  
41  
42 2020;9(5):1386.
- 43  
44 [25] Yang L, Smith L, Hamer M. Gender-specific risk factors for incident sarcopenia: 8-year  
45  
46 follow-up of the English longitudinal study of ageing. *J Epidemiol Community Health*  
47  
48 2019;73(1):86-88.
- 49  
50 [26] Anagnostis P, Gkekas NK, Achilla C, et al. Type 2 Diabetes Mellitus is Associated with  
51  
52 Increased Risk of Sarcopenia: A Systematic Review and Meta-analysis. *Calcif Tissue Int*  
53  
54 2020;107(5):453-63.
- 55  
56 [27] Di Bari M, van de Poll-Franse LV, Onder G, et al. Antihypertensive medications and  
57  
58 differences in muscle mass in older persons: the Health, Aging and Body Composition Study.  
59  
60 *J Am Geriatr Soc* 2004;52(6):961-6.

- 1  
2  
3  
4 [28] Onder G, Penninx BW, Balkrishnan R, et al. Relation between use of angiotensin-converting  
5 enzyme inhibitors and muscle strength and physical function in older women: an observational  
6 study. *Lancet* 2002;359(9310):926-30.  
7  
8  
9 [29] Ata AM, Kara M, Ekiz T, et al. Reassessing Sarcopenia in Hypertension: STAR and ACE  
10 Inhibitors Excel. *Int J Clin Pract* 2021;75(3):e13800.  
11  
12 [30] Silva IVG, de Figueiredo RC, Rios DRA. Effect of Different Classes of Antihypertensive  
13 Drugs on Endothelial Function and Inflammation. *Int J Mol Sci* 2019;20(14):3458.  
14  
15 [31] Henriksen EJ, Jacob S. Modulation of metabolic control by angiotensin converting enzyme  
16 (ACE) inhibition. *J Cell Physiol* 2003;196(1):171-9.  
17  
18 [32] Lee YL, Lee BH, Lee SY. Handgrip Strength in the Korean Population: Normative Data and  
19 Cutoff Values. *Ann Geriatr Med Res* 2019;23(4):183-89.  
20  
21 [33] Granic A, Mendonca N, Sayer AA, et al. Low protein intake, muscle strength and physical  
22 performance in the very old: The Newcastle 85+ Study. *Clin Nutr* 2018;37(6 Pt A):2260-70.  
23  
24 [34] Veronese N, Stubbs B, Punzi L, et al. Effect of nutritional supplementations on physical  
25 performance and muscle strength parameters in older people: A systematic review and meta-  
26 analysis. *Ageing Res Rev* 2019;51:48-54.  
27  
28 [35] Tang CH. Research of Pathogenesis and Novel Therapeutics in Arthritis. *Int J Mol Sci*  
29 2019;20(7):1646.  
30  
31 [36] Hitchon CA, Khan S, Elias B, et al. Prevalence and Incidence of Rheumatoid Arthritis in  
32 Canadian First Nations and Non-First Nations People: A Population-Based Study. *J Clin*  
33 *Rheumatol* 2020;26(5):169-75.  
34  
35 [37] Safiri S, Kolahi AA, Hoy D, et al. Global, regional and national burden of rheumatoid arthritis  
36 1990-2017: a systematic analysis of the Global Burden of Disease study 2017. *Ann Rheum Dis*  
37 2019;78(11):1463-71.  
38  
39 [38] Zhang Q, Liu Q, Lin C, et al. The prevalence of rheumatoid arthritis in middle-aged and elderly  
40 people living in Naqu City, Tibet, Autonomous Region of China. *J Orthop Surg Res*  
41 2020;15(1):338.  
42  
43 [39] Baker JF, Von Feldt J, Mostoufi-Moab S, et al. Deficits in muscle mass, muscle density, and  
44 modified associations with fat in rheumatoid arthritis. *Arthritis Care Res (Hoboken)*  
45  
46  
47  
48  
49  
50  
51  
52  
53  
54  
55  
56  
57  
58  
59  
60

2014;66(11):1612-8.

[40] Ekici R, Erden A, Güven SC, et al. Prevalence of sarcopenia and clinical implications in patients with newly diagnosed rheumatoid arthritis. *Nutrition* 2021;90:111353.

[41] Tekgoz E, Colak S, Ozalp Ates FS, et al. Sarcopenia in rheumatoid arthritis: Is it a common manifestation? *Int J Rheum Dis* 2020;23(12):1685-91.

[42] Torii M, Hashimoto M, Hanai A, et al. Prevalence and factors associated with sarcopenia in patients with rheumatoid arthritis. *Mod Rheumatol* 2019;29(4):589-95.

**Figure** Figure 1 participation of older adults

For peer review only

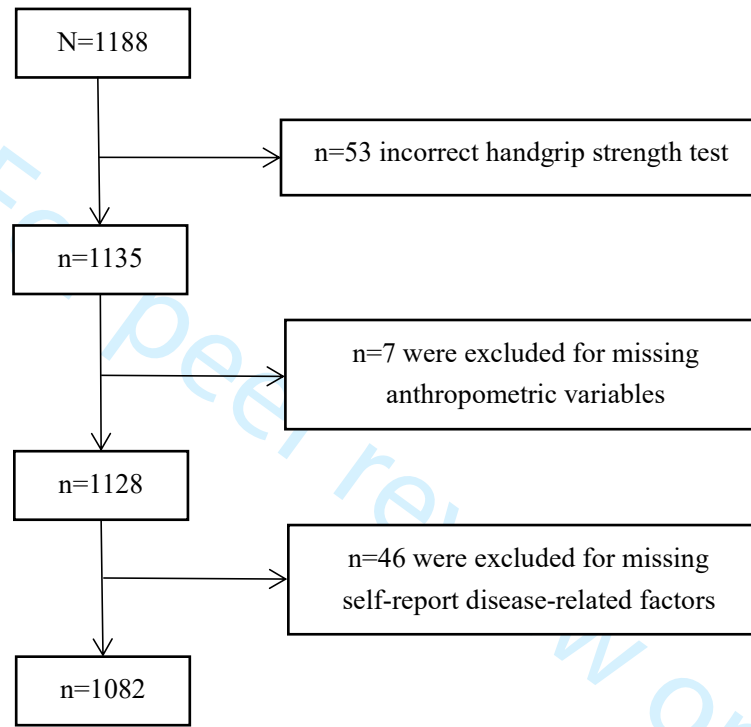

Figure 1 participation of older adults



# Reporting checklist for cross sectional study.

Based on the STROBE cross sectional guidelines.

## Instructions to authors

Complete this checklist by entering the page numbers from your manuscript where readers will find each of the items listed below.

Your article may not currently address all the items on the checklist. Please modify your text to include the missing information. If you are certain that an item does not apply, please write "n/a" and provide a short explanation.

Upload your completed checklist as an extra file when you submit to a journal.

In your methods section, say that you used the STROBE cross sectional reporting guidelines, and cite them as:

von Elm E, Altman DG, Egger M, Pocock SJ, Gøtzsche PC, Vandenbroucke JP. The Strengthening the Reporting of Observational Studies in Epidemiology (STROBE) Statement: guidelines for reporting observational studies.

|                           | Reporting Item                                                                                                      | Page Number |
|---------------------------|---------------------------------------------------------------------------------------------------------------------|-------------|
| <b>Title and abstract</b> |                                                                                                                     |             |
| Title                     | <a href="#">#1a</a> Indicate the study' s design with a commonly used term in the title or the abstract             | 1           |
| Abstract                  | <a href="#">#1b</a> Provide in the abstract an informative and balanced summary of what was done and what was found | 1-2         |
| <b>Introduction</b>       |                                                                                                                     |             |
| Background / rationale    | <a href="#">#2</a> Explain the scientific background and rationale for the investigation being reported             | 2-3         |
| Objectives                | <a href="#">#3</a> State specific objectives, including any prespecified hypotheses                                 | 3           |
| <b>Methods</b>            |                                                                                                                     |             |

|    |                            |                      |                                                                                                                                                                                                                                                                  |                                                                                                               |
|----|----------------------------|----------------------|------------------------------------------------------------------------------------------------------------------------------------------------------------------------------------------------------------------------------------------------------------------|---------------------------------------------------------------------------------------------------------------|
| 1  | Study design               | <a href="#">#4</a>   | Present key elements of study design early in the paper                                                                                                                                                                                                          | 3                                                                                                             |
| 2  |                            |                      |                                                                                                                                                                                                                                                                  |                                                                                                               |
| 3  |                            |                      |                                                                                                                                                                                                                                                                  |                                                                                                               |
| 4  | Setting                    | <a href="#">#5</a>   | Describe the setting, locations, and relevant dates, including periods of recruitment, exposure, follow-up, and data collection                                                                                                                                  | 3-4                                                                                                           |
| 5  |                            |                      |                                                                                                                                                                                                                                                                  |                                                                                                               |
| 6  |                            |                      |                                                                                                                                                                                                                                                                  |                                                                                                               |
| 7  |                            |                      |                                                                                                                                                                                                                                                                  |                                                                                                               |
| 8  |                            |                      |                                                                                                                                                                                                                                                                  |                                                                                                               |
| 9  |                            |                      |                                                                                                                                                                                                                                                                  |                                                                                                               |
| 10 | Eligibility criteria       | <a href="#">#6a</a>  | Give the eligibility criteria, and the sources and methods of selection of participants.                                                                                                                                                                         | 3-4                                                                                                           |
| 11 |                            |                      |                                                                                                                                                                                                                                                                  |                                                                                                               |
| 12 |                            |                      |                                                                                                                                                                                                                                                                  |                                                                                                               |
| 13 |                            |                      |                                                                                                                                                                                                                                                                  |                                                                                                               |
| 14 |                            | <a href="#">#7</a>   | Clearly define all outcomes, exposures, predictors, potential confounders, and effect modifiers. Give diagnostic criteria, if applicable                                                                                                                         | 4-5                                                                                                           |
| 15 |                            |                      |                                                                                                                                                                                                                                                                  |                                                                                                               |
| 16 |                            |                      |                                                                                                                                                                                                                                                                  |                                                                                                               |
| 17 |                            |                      |                                                                                                                                                                                                                                                                  |                                                                                                               |
| 18 |                            |                      |                                                                                                                                                                                                                                                                  |                                                                                                               |
| 19 | Data sources / measurement | <a href="#">#8</a>   | For each variable of interest give sources of data and details of methods of assessment (measurement). Describe comparability of assessment methods if there is more than one group. Give information separately for exposed and unexposed groups if applicable. | 4-5                                                                                                           |
| 20 |                            |                      |                                                                                                                                                                                                                                                                  |                                                                                                               |
| 21 |                            |                      |                                                                                                                                                                                                                                                                  |                                                                                                               |
| 22 |                            |                      |                                                                                                                                                                                                                                                                  |                                                                                                               |
| 23 |                            |                      |                                                                                                                                                                                                                                                                  |                                                                                                               |
| 24 |                            |                      |                                                                                                                                                                                                                                                                  |                                                                                                               |
| 25 |                            |                      |                                                                                                                                                                                                                                                                  |                                                                                                               |
| 26 |                            |                      |                                                                                                                                                                                                                                                                  |                                                                                                               |
| 27 |                            |                      |                                                                                                                                                                                                                                                                  |                                                                                                               |
| 28 |                            |                      |                                                                                                                                                                                                                                                                  |                                                                                                               |
| 29 | Bias                       | <a href="#">#9</a>   | Describe any efforts to address potential sources of bias                                                                                                                                                                                                        | 4(All physical examinations were performed by trained medical students according to standardized procedures.) |
| 30 |                            |                      |                                                                                                                                                                                                                                                                  |                                                                                                               |
| 31 |                            |                      |                                                                                                                                                                                                                                                                  |                                                                                                               |
| 32 |                            |                      |                                                                                                                                                                                                                                                                  |                                                                                                               |
| 33 |                            |                      |                                                                                                                                                                                                                                                                  |                                                                                                               |
| 34 |                            |                      |                                                                                                                                                                                                                                                                  |                                                                                                               |
| 35 | Study size                 | <a href="#">#10</a>  | Explain how the study size was arrived at                                                                                                                                                                                                                        | 3-4                                                                                                           |
| 36 |                            |                      |                                                                                                                                                                                                                                                                  |                                                                                                               |
| 37 |                            |                      |                                                                                                                                                                                                                                                                  |                                                                                                               |
| 38 | Quantitative variables     | <a href="#">#11</a>  | Explain how quantitative variables were handled in the analyses. If applicable, describe which groupings were chosen, and why                                                                                                                                    | 4-5                                                                                                           |
| 39 |                            |                      |                                                                                                                                                                                                                                                                  |                                                                                                               |
| 40 |                            |                      |                                                                                                                                                                                                                                                                  |                                                                                                               |
| 41 |                            |                      |                                                                                                                                                                                                                                                                  |                                                                                                               |
| 42 |                            |                      |                                                                                                                                                                                                                                                                  |                                                                                                               |
| 43 | Statistical methods        | <a href="#">#12a</a> | Describe all statistical methods, including those used to control for confounding                                                                                                                                                                                | 5                                                                                                             |
| 44 |                            |                      |                                                                                                                                                                                                                                                                  |                                                                                                               |
| 45 |                            |                      |                                                                                                                                                                                                                                                                  |                                                                                                               |
| 46 |                            |                      |                                                                                                                                                                                                                                                                  |                                                                                                               |
| 47 | Statistical methods        | <a href="#">#12b</a> | Describe any methods used to examine subgroups and interactions                                                                                                                                                                                                  | 5                                                                                                             |
| 48 |                            |                      |                                                                                                                                                                                                                                                                  |                                                                                                               |
| 49 |                            |                      |                                                                                                                                                                                                                                                                  |                                                                                                               |
| 50 |                            |                      |                                                                                                                                                                                                                                                                  |                                                                                                               |
| 51 | Statistical methods        | <a href="#">#12c</a> | Explain how missing data were addressed                                                                                                                                                                                                                          | 3 and Figure 1                                                                                                |
| 52 |                            |                      |                                                                                                                                                                                                                                                                  |                                                                                                               |
| 53 |                            |                      |                                                                                                                                                                                                                                                                  |                                                                                                               |
| 54 | Statistical methods        | <a href="#">#12d</a> | If applicable, describe analytical methods taking account of sampling strategy                                                                                                                                                                                   | 3-4                                                                                                           |
| 55 |                            |                      |                                                                                                                                                                                                                                                                  |                                                                                                               |
| 56 |                            |                      |                                                                                                                                                                                                                                                                  |                                                                                                               |
| 57 |                            |                      |                                                                                                                                                                                                                                                                  |                                                                                                               |
| 58 | Statistical                | <a href="#">#12e</a> | Describe any sensitivity analyses                                                                                                                                                                                                                                | 4-5                                                                                                           |
| 59 |                            |                      |                                                                                                                                                                                                                                                                  |                                                                                                               |
| 60 |                            |                      |                                                                                                                                                                                                                                                                  |                                                                                                               |

1 methods

2 **Results**

|    |                  |                      |                                                                                                                                                                                                                                                                                |
|----|------------------|----------------------|--------------------------------------------------------------------------------------------------------------------------------------------------------------------------------------------------------------------------------------------------------------------------------|
| 3  |                  |                      |                                                                                                                                                                                                                                                                                |
| 4  |                  |                      |                                                                                                                                                                                                                                                                                |
| 5  | Participants     | <a href="#">#13a</a> | Report numbers of individuals at each stage of study—eg numbers potentially eligible, examined for eligibility, confirmed eligible, included in the study, completing follow-up, and analysed. Give information separately for for exposed and unexposed groups if applicable. |
| 6  |                  |                      | 3-4                                                                                                                                                                                                                                                                            |
| 7  |                  |                      |                                                                                                                                                                                                                                                                                |
| 8  |                  |                      |                                                                                                                                                                                                                                                                                |
| 9  |                  |                      |                                                                                                                                                                                                                                                                                |
| 10 |                  |                      |                                                                                                                                                                                                                                                                                |
| 11 |                  |                      |                                                                                                                                                                                                                                                                                |
| 12 |                  |                      |                                                                                                                                                                                                                                                                                |
| 13 |                  |                      |                                                                                                                                                                                                                                                                                |
| 14 |                  |                      |                                                                                                                                                                                                                                                                                |
| 15 | Participants     | <a href="#">#13b</a> | Give reasons for non-participation at each stage                                                                                                                                                                                                                               |
| 16 |                  |                      | 3-4 (Figure 1)                                                                                                                                                                                                                                                                 |
| 17 | Participants     | <a href="#">#13c</a> | Consider use of a flow diagram                                                                                                                                                                                                                                                 |
| 18 |                  |                      | Figure 1                                                                                                                                                                                                                                                                       |
| 19 |                  |                      |                                                                                                                                                                                                                                                                                |
| 20 | Descriptive data | <a href="#">#14a</a> | Give characteristics of study participants (eg demographic, clinical, social) and information on exposures and potential confounders. Give information separately for exposed and unexposed groups if applicable.                                                              |
| 21 |                  |                      | 5-8                                                                                                                                                                                                                                                                            |
| 22 |                  |                      |                                                                                                                                                                                                                                                                                |
| 23 |                  |                      |                                                                                                                                                                                                                                                                                |
| 24 |                  |                      |                                                                                                                                                                                                                                                                                |
| 25 |                  |                      |                                                                                                                                                                                                                                                                                |
| 26 |                  |                      |                                                                                                                                                                                                                                                                                |
| 27 |                  |                      |                                                                                                                                                                                                                                                                                |
| 28 | Descriptive data | <a href="#">#14b</a> | Indicate number of participants with missing data for each variable of interest                                                                                                                                                                                                |
| 29 |                  |                      | 3(Figure 1)                                                                                                                                                                                                                                                                    |
| 30 |                  |                      |                                                                                                                                                                                                                                                                                |
| 31 |                  |                      |                                                                                                                                                                                                                                                                                |
| 32 | Outcome data     | <a href="#">#15</a>  | Report numbers of outcome events or summary measures. Give information separately for exposed and unexposed groups if applicable.                                                                                                                                              |
| 33 |                  |                      | 5-8                                                                                                                                                                                                                                                                            |
| 34 |                  |                      |                                                                                                                                                                                                                                                                                |
| 35 |                  |                      |                                                                                                                                                                                                                                                                                |
| 36 |                  |                      |                                                                                                                                                                                                                                                                                |
| 37 | Main results     | <a href="#">#16a</a> | Give unadjusted estimates and, if applicable, confounder-adjusted estimates and their precision (eg, 95% confidence interval). Make clear which confounders were adjusted for and why they were included                                                                       |
| 38 |                  |                      | NO (The study did not adjust for confounding factors.)                                                                                                                                                                                                                         |
| 39 |                  |                      |                                                                                                                                                                                                                                                                                |
| 40 |                  |                      |                                                                                                                                                                                                                                                                                |
| 41 |                  |                      |                                                                                                                                                                                                                                                                                |
| 42 |                  |                      |                                                                                                                                                                                                                                                                                |
| 43 |                  |                      |                                                                                                                                                                                                                                                                                |
| 44 |                  |                      |                                                                                                                                                                                                                                                                                |
| 45 | Main results     | <a href="#">#16b</a> | Report category boundaries when continuous variables were categorized                                                                                                                                                                                                          |
| 46 |                  |                      | 3-4                                                                                                                                                                                                                                                                            |
| 47 |                  |                      |                                                                                                                                                                                                                                                                                |
| 48 |                  |                      |                                                                                                                                                                                                                                                                                |
| 49 | Main results     | <a href="#">#16c</a> | If relevant, consider translating estimates of relative risk into absolute risk for a meaningful time period                                                                                                                                                                   |
| 50 |                  |                      | NO                                                                                                                                                                                                                                                                             |
| 51 |                  |                      |                                                                                                                                                                                                                                                                                |
| 52 |                  |                      |                                                                                                                                                                                                                                                                                |
| 53 |                  |                      |                                                                                                                                                                                                                                                                                |
| 54 | Other analyses   | <a href="#">#17</a>  | Report other analyses done—e.g., analyses of subgroups and interactions, and sensitivity analyses                                                                                                                                                                              |
| 55 |                  |                      | 6-8(The study was divided into two subgroups: men and                                                                                                                                                                                                                          |
| 56 |                  |                      |                                                                                                                                                                                                                                                                                |
| 57 |                  |                      |                                                                                                                                                                                                                                                                                |
| 58 |                  |                      |                                                                                                                                                                                                                                                                                |
| 59 |                  |                      |                                                                                                                                                                                                                                                                                |

women)

## Discussion

|                          |                     |                                                                                                                                                                  |      |
|--------------------------|---------------------|------------------------------------------------------------------------------------------------------------------------------------------------------------------|------|
| Key results              | <a href="#">#18</a> | Summarise key results with reference to study objectives                                                                                                         | 8-11 |
| Limitations              | <a href="#">#19</a> | Discuss limitations of the study, taking into account sources of potential bias or imprecision. Discuss both direction and magnitude of any potential bias.      | 11   |
| Interpretation           | <a href="#">#20</a> | Give a cautious overall interpretation considering objectives, limitations, multiplicity of analyses, results from similar studies, and other relevant evidence. | 8-11 |
| Generalisability         | <a href="#">#21</a> | Discuss the generalisability (external validity) of the study results                                                                                            | 11   |
| <b>Other Information</b> |                     |                                                                                                                                                                  |      |
| Funding                  | <a href="#">#22</a> | Give the source of funding and the role of the funders for the present study and, if applicable, for the original study on which the present article is based    | 12   |

None The STROBE checklist is distributed under the terms of the Creative Commons Attribution License CC-BY. This checklist can be completed online using <https://www.goodreports.org/>, a tool made by the [EQUATOR Network](#) in collaboration with [Penelope.ai](#)

# BMJ Open

## Prevalence of possible sarcopenia in community-dwelling older Chinese adults: a cross-sectional study

|                                 |                                                                                                                                                                                                                                                                                                                                                                                                                    |
|---------------------------------|--------------------------------------------------------------------------------------------------------------------------------------------------------------------------------------------------------------------------------------------------------------------------------------------------------------------------------------------------------------------------------------------------------------------|
| Journal:                        | <i>BMJ Open</i>                                                                                                                                                                                                                                                                                                                                                                                                    |
| Manuscript ID                   | bmjopen-2022-067425.R2                                                                                                                                                                                                                                                                                                                                                                                             |
| Article Type:                   | Original research                                                                                                                                                                                                                                                                                                                                                                                                  |
| Date Submitted by the Author:   | 21-Nov-2022                                                                                                                                                                                                                                                                                                                                                                                                        |
| Complete List of Authors:       | Yao, Jiaqin; Bengbu Medical College, School of nursing<br>Wang, Yaoting; Bengbu Medical College, Graduate School<br>Yang, Lin; Bengbu Medical College, School of nursing<br>Ren, Mengting; Bengbu Medical College, School of nursing<br>Li, LingYan; The First Affiliated Hospital of Bengbu Medical College, Department of Hepatobiliary Surgery<br>Wang, Hongyu; Bengbu Medical College, Physical fitness center |
| <b>Primary Subject Heading</b>: | Public health                                                                                                                                                                                                                                                                                                                                                                                                      |
| Secondary Subject Heading:      | Nursing, Geriatric medicine                                                                                                                                                                                                                                                                                                                                                                                        |
| Keywords:                       | GERIATRIC MEDICINE, PREVENTIVE MEDICINE, PRIMARY CARE, PUBLIC HEALTH                                                                                                                                                                                                                                                                                                                                               |
|                                 |                                                                                                                                                                                                                                                                                                                                                                                                                    |

SCHOLARONE™  
Manuscripts



I, the Submitting Author has the right to grant and does grant on behalf of all authors of the Work (as defined in the below author licence), an exclusive licence and/or a non-exclusive licence for contributions from authors who are: i) UK Crown employees; ii) where BMJ has agreed a CC-BY licence shall apply, and/or iii) in accordance with the terms applicable for US Federal Government officers or employees acting as part of their official duties; on a worldwide, perpetual, irrevocable, royalty-free basis to BMJ Publishing Group Ltd ("BMJ") its licensees and where the relevant Journal is co-owned by BMJ to the co-owners of the Journal, to publish the Work in this journal and any other BMJ products and to exploit all rights, as set out in our [licence](#).

The Submitting Author accepts and understands that any supply made under these terms is made by BMJ to the Submitting Author unless you are acting as an employee on behalf of your employer or a postgraduate student of an affiliated institution which is paying any applicable article publishing charge ("APC") for Open Access articles. Where the Submitting Author wishes to make the Work available on an Open Access basis (and intends to pay the relevant APC), the terms of reuse of such Open Access shall be governed by a Creative Commons licence – details of these licences and which [Creative Commons](#) licence will apply to this Work are set out in our licence referred to above.

Other than as permitted in any relevant BMJ Author's Self Archiving Policies, I confirm this Work has not been accepted for publication elsewhere, is not being considered for publication elsewhere and does not duplicate material already published. I confirm all authors consent to publication of this Work and authorise the granting of this licence.

# Prevalence of possible sarcopenia in community-dwelling older Chinese adults: a cross-sectional study

Jiaqin Yao<sup>1</sup>·Yaoting Wang<sup>2</sup>·Lin Yang<sup>1</sup>·Mengting Ren<sup>1</sup>·LingYan Li<sup>3</sup>·Hongyu Wang<sup>4</sup>

<sup>1</sup>School of nursing, Bengbu Medical College, Bengbu, Anhui, China

<sup>2</sup>Graduate School of Bengbu Medical College, Bengbu, Anhui, China

<sup>3</sup>Department of Hepatobiliary Surgery, the First Affiliated Hospital of Bengbu Medical College, Bengbu, Anhui, China

<sup>4</sup>Physical fitness center, Bengbu Medical College, Bengbu, Anhui, China

**Corresponding author:** Hongyu Wang

**E-mail:** [wanghongyu81920@163.com](mailto:wanghongyu81920@163.com)

**Number of references:** 42

**Abstract count:** 284

**Word count:** 3122

## Abstract

**Objectives** To determine the prevalence of possible sarcopenia and its association with other conditions in older adults in Bengbu, China.

**Design, setting and participants** A cross-sectional study of 1082 community-dwelling Chinese people aged at least 60 years from March to June, 2022.

**Methods** Handgrip strength and information regarding associated conditions were collected. Possible sarcopenia was estimated based on handgrip strength with cut-off values (< 28 kg in men; < 18 kg in women) recommended by the Asia Working Group for Sarcopenia in 2019 (AWGS 2019). Mann-Whitney U tests, Chi-square tests and binary logistic regression analyses were used to explore relationships between possible sarcopenia and associated conditions.

**Results** Possible sarcopenia was more prevalent in men (52.79%, n = 246, age 79.43 ± 7.33 years among men with possible sarcopenia) than in women (44.48%, n = 274, age 78.90 ± 7.71 years among women with possible sarcopenia). In men, possible sarcopenia positively correlated with high age [odds ratio (OR) = 2.658, 95% confidence interval (CI) 1.758-4.019], physical inactivity (OR = 2.779, 95% CI 1.646-4.691) and diabetes (OR = 4.269, 95% CI 2.397-7.602), and negatively

with hypertension (OR = 0.586, 95% CI 0.384-0.893). The risk of possible sarcopenia in men decreased by 12.6% for every 1 kg/m<sup>2</sup> increase of body mass index (BMI) (OR = 0.874, 95% CI 0.817-0.935). In women, possible sarcopenia positively correlated with high age (OR = 3.821, 95% CI 2.677-5.455), physical inactivity (OR = 2.185, 95% CI 1.488-3.210) and arthritis (OR = 2.076, 95% CI 1.411-3.056).

**Conclusion** Possible sarcopenia is prevalent in older adults and the factors affecting possible sarcopenia are different in men and women. Health education about these target factors can be considered as a potential measure to prevent possible sarcopenia.

#### **Strengths and limitations of this study**

- ⇒ This study used the concept of low handgrip strength (< 28 kg in men; < 18 kg in women) in the latest guideline (AWGS 2019) to assess possible sarcopenia.
- ⇒ The grouping of subjects by sex permitted additional insight into risk factors.
- ⇒ Because it was a cross-sectional study, cause-effect relationships could not be determined.

#### **Introduction**

As an independent disease in the 10<sup>th</sup> edition of International Classification of Diseases, sarcopenia has become an important public health issue [1]. Sarcopenia is a geriatric syndrome characterized by loss of muscle mass and muscle strength and decreased physical function [2]. Substantial evidence suggests that sarcopenia has an important impact on the health of older adults, and it often is associated with adverse outcomes such as illness, falls, reduced quality of life and even death [3]. Sarcopenia is not only associated with aging, but it can also result from a combination of chronic diseases including respiratory disease [4], diabetes [5] and cancer [6]. It is associated with environmental factors, and the risk of developing sarcopenia can be lowered by changes to physical activity and diet [7,8].

In order to help predict the occurrence of sarcopenia in at-risk populations, the concept of “probable sarcopenia” was introduced in the guideline of the European Working Group on Sarcopenia in Older People in 2018 (EWGSOP2). The guideline considered low muscle strength to be an indicator of probable sarcopenia [9]. In 2019, the Asia Working Group for Sarcopenia (AWGS) updated its guideline first issued in 2014 and proposed the concept of “possible sarcopenia”, which was defined as the existence of low muscle strength with or without reduced physical performance



1  
2  
3  
4 [10]. Both guidelines recommend using handgrip strength to assess muscle strength, but there are  
5 slight differences in threshold values used for diagnosis [9 10].  
6

7  
8 The uses of these two international guidelines lead to differences in the reported prevalence of  
9 possible sarcopenia among different populations. One study determined that the prevalence of  
10 probable sarcopenia in a group of subjects in a Colombian community with a mean age  $70.4 \pm 7.8$   
11 years was 46.5% based on threshold values from EWGSOP2 [11]. On the other hand, the values of  
12 the prevalence of probable sarcopenia in Swiss women (age  $84.1 \pm 5.7$  years) and men (age  $82.6 \pm$   
13  $5.2$  years) were determined to be 26.3% and 28.0%, respectively [12]. In a South Korean study, Kim  
14 et al used the cut-off values recommended by the AWGS 2019 to screen for the possible sarcopenia  
15 and found a prevalence of 20.1% in men (age  $76.4 \pm 3.9$  years) and a prevalence of 29.2% in women  
16 (age  $75.5 \pm 3.9$  years) [13].  
17  
18  
19  
20  
21  
22  
23  
24

25 Despite renewed interest in the condition, few studies have been performed to investigate the  
26 prevalence of possible sarcopenia and its relationship to various factors in Chinese populations.  
27 Therefore, the aims of this study were (1) to determine the prevalence of possible sarcopenia using  
28 the latest guideline (AWGS 2019) in a sample of older adults, aged 60 years and above, in Bengbu,  
29 China and (2) to explore the relationship between possible sarcopenia and its associated factors.  
30  
31  
32  
33  
34

## 35 **Methods**

### 36 **Sample**

37  
38 This was a cross-sectional, community-based study conducted in the city of Bengbu, China,  
39 from March, 2022, through June, 2022. Inclusion criteria for study participants were aged at least  
40 60 years, ability to understand relevant issues and ability to provide informed consent. Exclusion  
41 criteria were inability to complete the handgrip strength measurement and lack of complete medical  
42 or demographic data.  
43  
44  
45  
46  
47

48 To ensure that the sample findings were valid for estimating the prevalence of possible  
49 sarcopenia in the general population, we calculated a minimum sample size of 792, assuming a  
50 prevalence of possible sarcopenia of 24.6% [13], at a 3% error rate and 95% confidence interval.  
51 After considering the design effect as 1.5, the aim was to access a minimum sample size of 1188  
52 individuals. Multi-stage random cluster sampling and random numbers table were conducted. First,  
53 all the streets were listed and 7 streets were randomly grouped. Then, 3 communities were randomly  
54  
55  
56  
57  
58  
59  
60

1  
2  
3  
4 grouped into each street. Finally, we contacted the leaders of the selected communities, and  
5  
6 randomly recruited residents aged 60 years and above in each community to travel to nearby stalls  
7  
8 for assessment. As a result, the final sample included 1082 elderly participants for a 91.08%  
9  
10 response rate (Figure 1). Each participant signed an informed consent form. The Ethics Committee  
11  
12 of Bengbu Medical College approved the study protocol (Anhui, China; no.2018045).

### 13 **Patient and public involvement**

14  
15 The older adults were not involved in the design, conduct, reporting or dissemination plans of  
16  
17 our research.

### 18 **Anthropometric measurements**

19  
20 All physical examinations were performed by trained medical students according to  
21  
22 standardized procedures. Height and body weight were measured with a steel measuring tape and  
23  
24 an electronic scale, respectively. BMI was calculated as the weight in kilograms divided by the  
25  
26 square of the height in meters. Waist circumference (WC) was measured from the middle point  
27  
28 between the lower border of the rib cage and the iliac crest midaxillary at the end of a normal  
29  
30 expiration with a soft measuring tape.

### 31 **Assessment of possible sarcopenia**

32  
33 AWGS criteria (2019) define possible sarcopenia as the incidence of low muscle strength with  
34  
35 or without reduced physical performance, therefore, in this study, low muscle strength was the only  
36  
37 criterion used to define possible sarcopenia. Low muscle strength was defined as a handgrip strength  
38  
39 of less than 28 kg in men and less than 18 kg in women. Handgrip strength was measured with an  
40  
41 electronic hand dynamometer (EH101, <https://www.senssun.com>). Prior to use, the dynamometer  
42  
43 was calibrated according to the manufacturer's instructions. Each participant was asked to hold the  
44  
45 dynamometer with the dominant hand with as much force as possible for 3 s. This process was  
46  
47 repeated three times with 30 s between each trial, and the handgrip strength was taken as the  
48  
49 maximum value from these three trials<sup>[10]</sup>.

### 50 **Measurement of potential associated factors**

51  
52 Participants were sorted into two groups based on WHO age classification criteria: one group  
53  
54 included participants that were aged 60 to 74 years and the other group included participants who  
55  
56 were aged at least 75 years. Participants' level of physical activity was determined using self-  
57  
58 reported values. According to the latest *World Health Organization 2020 Guidelines on Physical*  
59  
60

1  
2  
3  
4 *Activity and Sedentary Behavior*<sup>[14]</sup>, physical inactivity was defined as engagement in less than 150  
5 minutes per week of moderate exercise, such as brisk walking, jogging or dancing, and the time of  
6 high intensity physical activity was multiplied by 2 to be translated into the time of moderate  
7 physical activity. Disease-related factors were assessed with a survey that asked the participants if  
8 they had been medically diagnosed with cancer, heart disease, hypertension, hyperlipidemia,  
9 diabetes, respiratory diseases, arthritis, or pain in the waist or lower extremities.

### 15 **Statistical analysis**

16  
17 SPSS 25.0 software (IBM, Armonk, NY, USA) was utilized for data analyses. Continuous  
18 variables were expressed as mean  $\pm$  SD. Categorical variables were expressed as frequencies and  
19 percentages. The normality of the variables was verified using Kolmogorov-Smirnov tests. The  
20 male and female samples were divided into two groups: no sarcopenia (normal handgrip strength)  
21 or possible sarcopenia (weak handgrip strength: < 28 kg in men; < 18 kg in women). Student's t-  
22 tests were applied to identify significant differences in normally distributed of continuous variables,  
23 while Mann-Whitney U tests were used for comparison of non-normally distributed of continuous  
24 variables between groups. The significance of differences in baseline characteristics were examined  
25 using chi-squared tests for categorical variables. The associated factors [age group, WC, BMI,  
26 physical inactivity, cancer, heart diseases, hypertension, hyperlipidemia, diabetes, respiratory  
27 diseases, arthritis, pain in the waist or lower extremities] that were determined to reach the level of  
28 significance ( $p < 0.05$ ) were included as independent variables in separate binary logistic regression  
29 analysis models for males and females, with possible sarcopenia as the dependent variable.

### 42 **Results**

43  
44 Data on handgrip strength and anthropometric measures were collected from 1,082 adults aged  
45 60 years and over (n = 466 men, n = 616 women; mean age  $76.62 \pm 7.11$  years). Of the participants,  
46 484 (44.73%) were aged from 60 to 74 years, and 598 (55.27%) were aged at least 75 years.

47  
48 Possible sarcopenia was determined according to the AWGS 2019 guidelines with gender-  
49 specific handgrip strength cut-off values. Of the 466 male participants, possible sarcopenia was  
50 identified in 246 (52.79%). Of the 616 female participants, possible sarcopenia was identified in  
51 274 (44.48%). In both men and women, the majority of participants identified as having possible  
52 sarcopenia were aged 75 years and over.

Height and weight were significantly lower in the possible sarcopenia group than in the no sarcopenia group (both  $p < 0.05$ ). Among male participants, BMI was significantly lower in the possible sarcopenia group than in the group of no sarcopenia ( $p < 0.05$ ), but there was no statistically significant difference in BMI among female participants ( $p > 0.05$ ). Moreover, the possible sarcopenia group had a great number of participants who were classified as physically inactive (Table 1).

In male participants, older adults with possible sarcopenia were significantly more likely than those without possible sarcopenia to have developed diabetes (22.76% vs 11.82%;  $p < 0.05$ ) and respiratory diseases (9.76% vs 3.64%;  $p < 0.05$ ). Conversely, participants with possible sarcopenia were significantly less likely to have developed hypertension (45.93% vs 57.73%;  $p < 0.05$ ). In female participants, older adults with possible sarcopenia were significantly more likely than those without possible sarcopenia to have developed arthritis (47.81% vs 30.41%;  $p < 0.05$ ), and pain in the waist or lower extremities (61.68% vs 53.80%;  $p < 0.05$ ) (Table 1).

Table 1 Characteristics of participants with or without possible sarcopenia

|                               | Overall sample<br>(n = 1082) | Men, n = 466 (43.07%)                    |                                    |                | Women, n=616 (56.93%)                    |                                    |                |
|-------------------------------|------------------------------|------------------------------------------|------------------------------------|----------------|------------------------------------------|------------------------------------|----------------|
|                               |                              | Possible sarcopenia<br>(n = 246; 52.79%) | No sarcopenia<br>(n = 220; 47.21%) | <i>P</i> value | Possible sarcopenia<br>(n = 274; 44.48%) | No sarcopenia (n<br>= 342; 55.52%) | <i>P</i> value |
|                               |                              | Age (years)                              | 76.62 ± 7.11                       | 79.43 ± 7.33   | 74.27 ± 4.92                             | < 0.001                            | 78.90 ± 7.71   |
| Age group (n, %)              |                              |                                          |                                    |                |                                          |                                    |                |
| 60-74 years                   | 484 (44.73)                  | 78 (31.71)                               | 122 (55.45)                        | < 0.001        | 82 (29.93)                               | 202 (59.06)                        | < 0.001        |
| ≥ 75 years                    | 598 (55.27)                  | 168 (68.29)                              | 98 (44.55)                         |                | 192 (70.07)                              | 140 (40.94)                        |                |
| Height (cm)                   | 158.31 ± 9.28                | 162.64 ± 6.39                            | 166.11 ± 10.02                     | < 0.001        | 151.00 ± 6.92                            | 156.04 ± 6.31                      | < 0.001        |
| Weight (kg)                   | 63.42 ± 12.27                | 64.61 ± 10.12                            | 71.80 ± 10.14                      | < 0.001        | 56.96 ± 10.55                            | 62.35 ± 12.95                      | < 0.001        |
| WC (cm)                       | 90.83 ± 9.95                 | 91.26 ± 10.01                            | 91.95 ± 7.92                       | 0.204          | 89.83 ± 10.76                            | 90.59 ± 10.35                      | 0.553          |
| handgrip strength (kg)        | 22.91 ± 8.57                 | 21.49 ± 5.21                             | 35.42 ± 5.11                       | < 0.001        | 13.85 ± 3.72                             | 23.14 ± 4.13                       | < 0.001        |
| BMI (kg/m <sup>2</sup> )      | 25.40 ± 6.75                 | 24.42 ± 3.49                             | 26.62 ± 11.42                      | < 0.001        | 25.00 ± 4.68                             | 25.63 ± 5.72                       | 0.428          |
| Physical inactivity<br>(n, %) | 270 (24.95)                  | 71 (28.86)                               | 28 (12.73)                         | < 0.001        | 97 (35.40)                               | 74 (21.64)                         | < 0.001        |

|                                                     |             |             |             |       |             |             |         |
|-----------------------------------------------------|-------------|-------------|-------------|-------|-------------|-------------|---------|
| Cancer (n, %)                                       | 18 (1.66)   | 6 (2.44)    | 2 (0.91)    | 0.204 | 6 (2.19)    | 4 (1.17)    | 0.319   |
| Heart diseases (n, %)                               | 345 (31.89) | 70 (28.45)  | 76 (34.55)  | 0.157 | 80 (29.20)  | 119 (34.80) | 0.140   |
| Hypertension (n, %)                                 | 599 (55.36) | 113 (45.93) | 127 (57.73) | 0.011 | 170 (62.04) | 189 (55.26) | 0.090   |
| Hyperlipidemia (n, %)                               | 208 (19.22) | 46 (18.70)  | 44 (20.00)  | 0.723 | 48 (17.52)  | 70 (20.47)  | 0.355   |
| Diabetes (n, %)                                     | 201 (18.58) | 56 (22.76)  | 26 (11.82)  | 0.002 | 54 (19.71)  | 65 (19.01)  | 0.836   |
| Respiratory diseases<br>(n, %)                      | 93 (8.60)   | 24 (9.76)   | 8 (3.64)    | 0.009 | 32 (11.68)  | 29 (8.48)   | 0.186   |
| Arthritis (n, %)                                    | 349 (32.26) | 59 (23.98)  | 55 (25.00)  | 0.799 | 131 (47.81) | 104 (30.41) | < 0.001 |
| Pain in the waist or<br>lower extremities<br>(n, %) | 534 (49.35) | 93 (37.80)  | 89 (40.45)  | 0.499 | 169 (61.68) | 184 (53.80) | 0.049   |

WC, waist circumference; BMI, body mass index

For male participants, a binary logistic regression analysis showed that the correlating variables age, BMI, physical inactivity, hypertension, diabetes and respiratory diseases explained whether a participant had possible sarcopenia or not to 23.6% (Nagelkerke's  $R^2 = 0.236$ , Chi-squared (6) = 90.767,  $p < 0.0001$ ), and the percentage accuracy in classification was 65.9%. Higher age (OR = 2.658, 95% CI 1.758-4.019), physical inactivity (OR = 2.779, 95% CI 1.646-4.691) and diabetes (OR = 4.269, 95% CI 2.397-7.602) were risk factors for possible sarcopenia. Conversely, hypertension (OR = 0.586, 95% CI 0.384-0.893) was a protective factor for possible sarcopenia. Moreover, the risk of possible sarcopenia decreased by 12.6% for every 1 kg/m<sup>2</sup> increase of BMI (OR = 0.874, 95% CI 0.817-0.935). Respiratory disease did not have a significant association with possible sarcopenia (Table 2).

For female participants, a binary logistic regression analysis showed that the correlating variables age, physical inactivity, arthritis and pain in lower extremities or waist explained whether a participant had possible sarcopenia or not to 18.5% (Nagelkerke's  $R^2 = 0.185$ , Chi-squared (4) = 91.593,  $p < 0.0001$ ), and the percentage accuracy in classification was 67.4%. Higher age (OR = 3.821, 95% CI 2.677-5.455), physical inactivity (OR = 2.185, 95% CI 1.488-3.210) and arthritis (OR = 2.076, 95% CI 1.411- 3.056) were risk factors for possible sarcopenia. However, pain in the lower extremities or waist did not have a significant association with possible sarcopenia (Table 3).

Table2 Binary logistic regression analysis of possible sarcopenia category by correlated variables

in men

| Variables                                    | Wald   | Degrees of freedom | P value | OR     | 95% CI |       |
|----------------------------------------------|--------|--------------------|---------|--------|--------|-------|
|                                              |        |                    |         |        | Lower  | Upper |
| Age group ( $\geq 75$ years vs. 60-74 years) | 21.478 | 1                  | < 0.001 | 2.658  | 1.758  | 4.019 |
| Physical inactivity (yes vs. no)             | 14.640 | 1                  | < 0.001 | 2.779  | 1.646  | 4.691 |
| Hypertension (yes vs. no)                    | 6.174  | 1                  | 0.013   | 0.586  | 0.384  | 0.893 |
| Diabetes (yes vs. no)                        | 24.289 | 1                  | < 0.001 | 4.269  | 2.397  | 7.602 |
| Respiratory diseases (yes vs. no)            | 2.659  | 1                  | 0.103   | 2.169  | 0.855  | 5.501 |
| BMI                                          | 15.378 | 1                  | < 0.001 | 0.874  | 0.817  | 0.935 |
| Constant                                     | 9.647  | 1                  | 0.002   | 14.990 |        |       |

Age groups, physical inactivity, hypertension, diabetes, respiratory diseases and BMI were simultaneously included in the model.

OR, odds ratio; 95% CI, confidence interval; BMI, body mass index

Table3 Binary logistic regression analysis of possible sarcopenia category by correlated variables

in women

| Variables                                           | Wald   | Degrees of freedom | P value | OR    | 95% CI |       |
|-----------------------------------------------------|--------|--------------------|---------|-------|--------|-------|
|                                                     |        |                    |         |       | Lower  | Upper |
| Age group ( $\geq 75$ years vs. 60-74 years)        | 54.498 | 1                  | < 0.001 | 3.821 | 2.677  | 5.455 |
| Physical inactivity (yes vs. no)                    | 15.874 | 1                  | < 0.001 | 2.185 | 1.488  | 3.210 |
| Arthritis (yes vs. no)                              | 13.733 | 1                  | < 0.001 | 2.076 | 1.411  | 3.056 |
| Pain in the waist or lower extremities (yes vs. no) | 0.756  | 1                  | 0.384   | 1.186 | 0.807  | 1.742 |
| Constant                                            | 64.394 | 1                  | < 0.001 | 0.207 |        |       |

Age groups, physical inactivity, arthritis and pain in the waist or lower extremities were simultaneously included in the model.

OR, odds ratio; 95% CI, confidence interval

## Discussion

We investigated the prevalence of possible sarcopenia and its correlation with associated factors. We found that possible sarcopenia has a high prevalence in the community of Bengbu. The prevalence of 48.06% is higher than the prevalence of 38.5% found in adults in another study conducted in China<sup>[15]</sup>. The reason for this discrepancy may be that the population in our study was

1  
2  
3  
4 older than the population (age  $68.13 \pm 6.46$  years) in the previous study. It should also be noted that  
5  
6 the prevalence identified in our study is higher than that found in another study of similarly aged  
7  
8 subjects (age  $75.9 \pm 3.9$ ) from the Asian country of South Korea [13]. The reason for this discrepancy  
9  
10 may be that the South Korean study used the calf circumference, SARC-F or SARC-CalF scales to  
11  
12 screen participants prior to administering the handgrip strength test, whereas the present study used  
13  
14 handgrip strength test directly to identify possible sarcopenia. This difference suggests that many  
15  
16 of the older adults in South Korea who were not identified as candidates for the handgrip strength  
17  
18 test according to calf circumference, SARC-F or SARC-CalF scale criteria may have had lower  
19  
20 handgrip strengths indicative of possible sarcopenia. Therefore, direct measurement of handgrip  
21  
22 strength has important clinical value.

23  
24 Our study found that possible sarcopenia is more common among men than women (52.79%  
25  
26 in men and 44.48% in women), as did a study performed by Wearing et al [12] (28% in men and 26.3%  
27  
28 in women). Interestingly, Pang et al [16] found that the prevalence of possible sarcopenia in men  
29  
30 between the ages of 20 and 60 years (13%) is lower than that in women in the same age group  
31  
32 (14.2%), but the relative prevalence in older adults over the age of 60 years is reversed (33.7% in  
33  
34 men and 30.9% in women). A possible mechanism of pathogenesis of leading to differences in  
35  
36 possible sarcopenia in men and women involves testosterone. Testosterone plays an important role  
37  
38 in the development and maintenance of muscle mass and function and can increase muscle mass  
39  
40 and muscle strength [17 18]. Testosterone in men declines at a rate of 1% per year after the age of 30,  
41  
42 and 40 to 70% of men over the age of 70 have low testosterone levels [19]. This may be one of the  
43  
44 important reasons why the prevalence rate of older men is higher than that of women.

45  
46 We found that high age and physical inactivity are positively associated with the prevalence of  
47  
48 possible sarcopenia. This result is consistent with other studies that have identified the main cause  
49  
50 of possible sarcopenia as age-related loss of muscle strength. A study of subjects from a Chinese  
51  
52 population identified a 50.8% decrease in right handgrip strength in men aged 85 to 90 years  
53  
54 compared to men aged 45 to 50 years and a 55.0% decrease in right handgrip strength in women  
55  
56 [20]. Several studies have reported that physical inactivity is the primary risk factor for decreased  
57  
58 muscle strength [21 22]. Tsekoura et al [23] and Makizako et al [24] confirmed that exercise intervention  
59  
60 for older adults slows the decline of muscle strength with age. Nearly a quarter of the participants

1  
2  
3  
4 were physically inactive, which is another potential explanation for the high prevalence of possible  
5 sarcopenia observed in this study. The correlations of age and physical inactivity with possible  
6 sarcopenia suggests that encouraging more physical activity in older adults is particularly important  
7 to prevent or delay the onset and progression of sarcopenia.  
8  
9  
10

11 The relationships of various factors to possible sarcopenia differed between the sexes. In men,  
12 diabetes was found to have a strong correlation with possible sarcopenia. Diabetes was associated  
13 with a 4.269-fold increase in the risk of possible sarcopenia in older men, but there was no  
14 correlation found in older women. Likewise, a longitudinal study in the United Kingdom showed  
15 an increase in probable sarcopenia after eight years in men with diabetes, but not in women [25].  
16 However, Anagnostis et al [26] reported that muscle strength was significantly lower in patients with  
17 type 2 diabetes mellitus than in subjects without diabetes, but a significant relationship only existed  
18 in women [standardized mean difference (SMD) for women – 0.52, 95% CI – 0.98 to – 0.06,  $p =$   
19 0.02; SMD for men – 0.42, 95% CI – 0.97 to 0.13,  $p = 0.13$ ]. Thus, it is necessary to further  
20 investigate the existence of gender differences in the relationship between diabetes and possible  
21 sarcopenia.  
22  
23  
24  
25  
26  
27  
28  
29  
30  
31  
32

33 We also found that hypertension is a protective factor for possible sarcopenia in men. Several  
34 studies showed that patients taking angiotensin converting enzyme inhibitors (ACEI) as therapy for  
35 hypertension had higher muscle strength than patients without hypertension and patients with  
36 hypertension who were not taking ACEI [27 28]. Similarly, Ata et al pointed that ACEI therapy seems  
37 to have favourable effects on both hypertension and sarcopenia [29]. The treatment reduces  
38 inflammation and endothelial dysfunction in hypertension [30] and may improve skeletal muscle  
39 function by increasing muscle blood flow and glucose delivery [31]. Although more than half of the  
40 participants in our study were hypertensive, the medications they were taking were not investigated,  
41 so the relationship between hypertensive medications and possible sarcopenia will be further  
42 explored in later studies.  
43  
44  
45  
46  
47  
48  
49  
50  
51

52 We also found that the risk of possible sarcopenia in men decreased by 12.6% for every 1  
53 kg/m<sup>2</sup> increase of BMI. A study based on a Korean population showed that BMI was positively  
54 correlated with handgrip strength in both men and women, and the correlation was higher in men ( $\beta$   
55 = 0.976,  $r = 0.378$ ) than in women ( $\beta = 0.190$ ,  $r = 0.134$ ) [32]. Older adults with low BMI values may  
56  
57  
58  
59  
60



1  
2  
3  
4 be underweight and at risk of malnutrition. For example, Granic et al [33] found that a low protein  
5 intake (<1g/kg) was associated with lower handgrip strength. A systematic review and meta-  
6 analysis showed that multi-nutrients significantly improved handgrip strength (n = 6 studies; 780  
7 participants; SMD = 0.41; 95%CI: 0.06 to 0.76;  $I^2 = 79\%$ ), and nutritional supplementations with  
8 protein or amino acids was also associated with improved handgrip strength (n = 7 studies; 535  
9 participants; SMD = 0.24; 95%CI: 0.07 to 0.41;  $I^2 = 16\%$ ) [34]. Therefore, early nutritional  
10 intervention for older patients with possible sarcopenia is an important strategy in decreasing the  
11 risk of progression to sarcopenia.  
12  
13  
14  
15  
16  
17  
18

19 In our study, women with arthritis were found to have a higher risk of possible sarcopenia.  
20 There are more than 100 types of arthritis. Rheumatoid arthritis (RA) is the most common form, but  
21 other common types of arthritis include osteoarthritis and inflammatory arthritis [35]. Several studies  
22 have shown that women are more likely to be diagnosed with RA than men [36-38], and adults with  
23 RA tend to have lower muscle masses or strengths compared to adults without RA [39-41]. Notably,  
24 RA can cause joint pain and deformity, therefore, it is unclear to what extent decreases in handgrip  
25 strength in patients with RA reflect true low muscle strength and how much of the limited handgrip  
26 strength may be secondary to pain or deformity [42]. Thence, other measurements should be  
27 considered to assess the possible sarcopenia in arthritis adults.  
28  
29  
30  
31  
32  
33  
34  
35

36 The major strength of our study is that it assessed possible sarcopenia using the latest guideline  
37 (AWGS 2019) and analyzed two subgroups based on gender. However, several limitations should  
38 be mentioned. First, this study focused solely on a population of older adults in Bengbu, so findings  
39 may not be generalizable to other populations. Second, we did not investigate nutritional factors that  
40 may be related to possible sarcopenia; a nutrition survey will be added in future studies.  
41  
42  
43  
44  
45

## 46 **Conclusions**

47  
48 The prevalence of possible sarcopenia in older adults in Bengbu is high, and it is more common  
49 among men than women. Men with high age, physical inactivity, diabetes and no hypertension had  
50 a higher prevalence of possible sarcopenia. And BMI was also found to be an independent risk  
51 factor for possible sarcopenia in men. Women with high age, physical inactivity and arthritis had a  
52 higher prevalence of possible sarcopenia. Community health care institutions should pay attention  
53  
54  
55  
56  
57  
58  
59  
60

1  
2  
3  
4 to the screening of possible sarcopenia, especially among older men. Targeted health education  
5 should also be carried out to encourage older adults to actively participate in physical exercise.

6  
7 **Acknowledgements** We want to thank all the participants involved in the study. We would also like  
8 to thank the hardworking research personnel involved in the data collection making this study  
9 possible.  
10

11  
12  
13 **Funding** This work was supported in part by Major project of Humanities and Social Sciences in  
14 Universities of Anhui Province (SK2020ZD32), the 512 Talent Cultivation Program of Bengbu  
15 Medical College (by51201208) and the Graduate Research Innovation Plan of Bengbu Medical  
16 College in 2021 (Byycx21023).  
17  
18

19  
20  
21 **Conflict of interest** The authors have no conflicts of interest.  
22

23 **Ethics approval** Ethical approval was obtained by the ethics committees of Bengbu Medical  
24 College (Anhui, China; no.2018045).  
25

26  
27 **Statement of human participants and/or animals** All the procedures performed in this study  
28 involving human participants were in accordance with the ethical standards of the institutional and  
29 national research committee and with the 1964 Declaration of Helsinki and its later amendments.  
30

31  
32 **Informed consent** All individual participants in the research gave their informed consent.  
33

34  
35 **Data availability statement** The data are held at Physical fitness center of Bengbu Medical College.  
36

37 **Author contributions** Jiaqin Yao: conceptualization, methodology, data collection, writing,  
38 investigation, statistical analysis. Yaoting Wang: data collection, methodology, writing,  
39 investigation. Lin Yang: data collection, writing. Mengting Ren: data collection, writing. Lingyan  
40 Li: writing. Hongyu Wang: conceptualization, methodology, statistical analysis.  
41  
42  
43

#### 44 **References**

- 45  
46 [1] Cao L, Morley JE. Sarcopenia Is Recognized as an Independent Condition by an International  
47 Classification of Disease, Tenth Revision, Clinical Modification (ICD-10-CM) Code. *J Am*  
48 *Med Dir Assoc* 2016;17(8):675-7.  
49  
50 [2] Cruz-Jentoft AJ, Baeyens JP, Bauer JM, et al. Sarcopenia: European consensus on definition  
51 and diagnosis: Report of the European Working Group on Sarcopenia in Older People. *Age*  
52 *Ageing* 2010;39(4):412-23.  
53  
54 [3] Keller K. Sarcopenia. *Wien Med Wochenschr* 2019;169(7-8):157-72.  
55  
56  
57  
58  
59  
60

- 1  
2  
3  
4 [4] Bone AE, Heggul N, Kon S, et al. Sarcopenia and frailty in chronic respiratory disease. *Chron*  
5 *Respir Dis* 2017;14(1):85-99.  
6  
7 [5] Izzo A, Massimino E, Riccardi G, et al. A Narrative Review on Sarcopenia in Type 2 Diabetes  
8 Mellitus: Prevalence and Associated Factors. *Nutrients* 2021;13(1):183.  
9  
10 [6] Pamoukdjian F, Bouillet T, Lévy V, et al. Prevalence and predictive value of pre-therapeutic  
11 sarcopenia in cancer patients: A systematic review. *Clin Nutr* 2018;37(4):1101-13.  
12  
13 [7] Nascimento CM, Ingles M, Salvador-Pascual A, et al. Sarcopenia, frailty and their prevention  
14 by exercise. *Free Radic Biol Med* 2019;132:42-49.  
15  
16 [8] Sieber CC. Malnutrition and sarcopenia. *Ageing Clin Exp Res* 2019;31(6):793-98.  
17  
18 [9] Cruz-Jentoft AJ, Bahat G, Bauer J, et al. Sarcopenia: revised European consensus on definition  
19 and diagnosis. *Age Ageing* 2019;48(1):16-31.  
20  
21 [10] Chen LK, Woo J, Assantachai P, et al. Asian Working Group for Sarcopenia: 2019 Consensus  
22 Update on Sarcopenia Diagnosis and Treatment. *J Am Med Dir Assoc* 2020;21(3):300-07.e2.  
23  
24 [11] Pérez-Sousa M, Pozo-Cruz JD, Cano-Gutiérrez CA, et al. High Prevalence of Probable  
25 Sarcopenia in a Representative Sample From Colombia: Implications for Geriatrics in Latin  
26 America. *J Am Med Dir Assoc* 2021;22(4):859-64.e1.  
27  
28 [12] Wearing J, Konings P, de Bie RA, et al. Prevalence of probable sarcopenia in community-  
29 dwelling older Swiss people - a cross-sectional study. *BMC Geriatr* 2020;20(1):307.  
30  
31 [13] Kim M, Won CW. Sarcopenia in Korean Community-Dwelling Adults Aged 70 Years and  
32 Older: Application of Screening and Diagnostic Tools From the Asian Working Group for  
33 Sarcopenia 2019 Update. *J Am Med Dir Assoc* 2020;21(6):752-58.  
34  
35 [14] Bull FC, Al-Ansari SS, Biddle S, et al. World Health Organization 2020 guidelines on physical  
36 activity and sedentary behaviour. *Br J Sports Med* 2020;54(24):1451-62.  
37  
38 [15] Wu X, Li X, Xu M, et al. Sarcopenia prevalence and associated factors among older Chinese  
39 population: Findings from the China Health and Retirement Longitudinal Study. *PLoS One*  
40 2021;16(3):e0247617.  
41  
42 [16] Pang BWJ, Wee SL, Lau LK, et al. Prevalence and Associated Factors of Sarcopenia in  
43 Singaporean Adults-The Yishun Study. *J Am Med Dir Assoc* 2021;22(4):885.e1-85.e10.  
44  
45 [17] Bhasin S, Woodhouse L, Casaburi R, et al. Older men are as responsive as young men to the  
46  
47  
48  
49  
50  
51  
52  
53  
54  
55  
56  
57  
58  
59  
60

- 1  
2  
3  
4 anabolic effects of graded doses of testosterone on the skeletal muscle. *J Clin Endocrinol*  
5 *Metab* 2005;90(2):678-88.  
6  
7 [18] Storer TW, Basaria S, Traustadottir T, et al. Effects of Testosterone Supplementation for 3  
8 Years on Muscle Performance and Physical Function in Older Men. *J Clin Endocrinol Metab*  
9 2017;102(2):583-93.  
10  
11 [19] Shin MJ, Jeon YK, Kim IJ. Testosterone and Sarcopenia. *World J Mens Health*  
12 2018;36(3):192-98.  
13  
14 [20] Huang G, Wu L. Handgrip Strength References for Middle-Age and Older Chinese Individuals.  
15 *J Am Med Dir Assoc* 2020;21(2):286-87.  
16  
17 [21] Ramsey KA, Rojer AGM, D'Andrea L, et al. The association of objectively measured physical  
18 activity and sedentary behavior with skeletal muscle strength and muscle power in older adults:  
19 A systematic review and meta-analysis. *Ageing Res Rev* 2021;67:101266.  
20  
21 [22] Simsek H, Meseri R, Sahin S, et al. Prevalence of sarcopenia and related factors in community-  
22 dwelling elderly individuals. *Saudi Med J* 2019;40(6):568-74.  
23  
24 [23] Tsekoura M, Billis E, Tsepis E, et al. The Effects of Group and Home-Based Exercise  
25 Programs in Elderly with Sarcopenia: A Randomized Controlled Trial. *J Clin Med*  
26 2018;7(12):480.  
27  
28 [24] Makizako H, Nakai Y, Tomioka K, et al. Effects of a Multicomponent Exercise Program in  
29 Physical Function and Muscle Mass in Sarcopenic/Pre-Sarcopenic Adults. *J Clin Med*  
30 2020;9(5):1386.  
31  
32 [25] Yang L, Smith L, Hamer M. Gender-specific risk factors for incident sarcopenia: 8-year  
33 follow-up of the English longitudinal study of ageing. *J Epidemiol Community Health*  
34 2019;73(1):86-88.  
35  
36 [26] Anagnostis P, Gkekas NK, Achilla C, et al. Type 2 Diabetes Mellitus is Associated with  
37 Increased Risk of Sarcopenia: A Systematic Review and Meta-analysis. *Calcif Tissue Int*  
38 2020;107(5):453-63.  
39  
40 [27] Di Bari M, van de Poll-Franse LV, Onder G, et al. Antihypertensive medications and  
41 differences in muscle mass in older persons: the Health, Aging and Body Composition Study.  
42 *J Am Geriatr Soc* 2004;52(6):961-6.  
43  
44  
45  
46  
47  
48  
49  
50  
51  
52  
53  
54  
55  
56  
57  
58  
59  
60

- 1  
2  
3  
4 [28] Onder G, Penninx BW, Balkrishnan R, et al. Relation between use of angiotensin-converting  
5 enzyme inhibitors and muscle strength and physical function in older women: an observational  
6 study. *Lancet* 2002;359(9310):926-30.  
7  
8  
9 [29] Ata AM, Kara M, Ekiz T, et al. Reassessing Sarcopenia in Hypertension: STAR and ACE  
10 Inhibitors Excel. *Int J Clin Pract* 2021;75(3):e13800.  
11  
12 [30] Silva IVG, de Figueiredo RC, Rios DRA. Effect of Different Classes of Antihypertensive  
13 Drugs on Endothelial Function and Inflammation. *Int J Mol Sci* 2019;20(14):3458.  
14  
15 [31] Henriksen EJ, Jacob S. Modulation of metabolic control by angiotensin converting enzyme  
16 (ACE) inhibition. *J Cell Physiol* 2003;196(1):171-9.  
17  
18 [32] Lee YL, Lee BH, Lee SY. Handgrip Strength in the Korean Population: Normative Data and  
19 Cutoff Values. *Ann Geriatr Med Res* 2019;23(4):183-89.  
20  
21 [33] Granic A, Mendonca N, Sayer AA, et al. Low protein intake, muscle strength and physical  
22 performance in the very old: The Newcastle 85+ Study. *Clin Nutr* 2018;37(6 Pt A):2260-70.  
23  
24 [34] Veronese N, Stubbs B, Punzi L, et al. Effect of nutritional supplementations on physical  
25 performance and muscle strength parameters in older people: A systematic review and meta-  
26 analysis. *Ageing Res Rev* 2019;51:48-54.  
27  
28 [35] Tang CH. Research of Pathogenesis and Novel Therapeutics in Arthritis. *Int J Mol Sci*  
29 2019;20(7):1646.  
30  
31 [36] Hitchon CA, Khan S, Elias B, et al. Prevalence and Incidence of Rheumatoid Arthritis in  
32 Canadian First Nations and Non-First Nations People: A Population-Based Study. *J Clin*  
33 *Rheumatol* 2020;26(5):169-75.  
34  
35 [37] Safiri S, Kolahi AA, Hoy D, et al. Global, regional and national burden of rheumatoid arthritis  
36 1990-2017: a systematic analysis of the Global Burden of Disease study 2017. *Ann Rheum Dis*  
37 2019;78(11):1463-71.  
38  
39 [38] Zhang Q, Liu Q, Lin C, et al. The prevalence of rheumatoid arthritis in middle-aged and elderly  
40 people living in Naqu City, Tibet, Autonomous Region of China. *J Orthop Surg Res*  
41 2020;15(1):338.  
42  
43 [39] Baker JF, Von Feldt J, Mostoufi-Moab S, et al. Deficits in muscle mass, muscle density, and  
44 modified associations with fat in rheumatoid arthritis. *Arthritis Care Res (Hoboken)*  
45  
46  
47  
48  
49  
50  
51  
52  
53  
54  
55  
56  
57  
58  
59  
60

2014;66(11):1612-8.

[40] Ekici R, Erden A, Güven SC, et al. Prevalence of sarcopenia and clinical implications in patients with newly diagnosed rheumatoid arthritis. *Nutrition* 2021;90:111353.

[41] Tekgoz E, Colak S, Ozalp Ates FS, et al. Sarcopenia in rheumatoid arthritis: Is it a common manifestation? *Int J Rheum Dis* 2020;23(12):1685-91.

[42] Torii M, Hashimoto M, Hanai A, et al. Prevalence and factors associated with sarcopenia in patients with rheumatoid arthritis. *Mod Rheumatol* 2019;29(4):589-95.

**Figure** Figure 1 participation of older adults

For peer review only



Figure 1 participation of older adults

# Reporting checklist for cross sectional study.

Based on the STROBE cross sectional guidelines.

## Instructions to authors

Complete this checklist by entering the page numbers from your manuscript where readers will find each of the items listed below.

Your article may not currently address all the items on the checklist. Please modify your text to include the missing information. If you are certain that an item does not apply, please write "n/a" and provide a short explanation.

Upload your completed checklist as an extra file when you submit to a journal.

In your methods section, say that you used the STROBE cross sectional reporting guidelines, and cite them as:

von Elm E, Altman DG, Egger M, Pocock SJ, Gotsche PC, Vandenbroucke JP. The Strengthening the Reporting of Observational Studies in Epidemiology (STROBE) Statement: guidelines for reporting observational studies.

|                           | Reporting Item                                                                                                      | Page Number |
|---------------------------|---------------------------------------------------------------------------------------------------------------------|-------------|
| <b>Title and abstract</b> |                                                                                                                     |             |
| Title                     | <a href="#">#1a</a> Indicate the study' s design with a commonly used term in the title or the abstract             | 1           |
| Abstract                  | <a href="#">#1b</a> Provide in the abstract an informative and balanced summary of what was done and what was found | 1-2         |
| <b>Introduction</b>       |                                                                                                                     |             |
| Background / rationale    | <a href="#">#2</a> Explain the scientific background and rationale for the investigation being reported             | 2-3         |
| Objectives                | <a href="#">#3</a> State specific objectives, including any prespecified hypotheses                                 | 3           |
| <b>Methods</b>            |                                                                                                                     |             |



|    |                            |                      |                                                                                                                                                                                                                                                                  |                                                                                                               |
|----|----------------------------|----------------------|------------------------------------------------------------------------------------------------------------------------------------------------------------------------------------------------------------------------------------------------------------------|---------------------------------------------------------------------------------------------------------------|
| 1  | Study design               | <a href="#">#4</a>   | Present key elements of study design early in the paper                                                                                                                                                                                                          | 3                                                                                                             |
| 2  |                            |                      |                                                                                                                                                                                                                                                                  |                                                                                                               |
| 3  |                            |                      |                                                                                                                                                                                                                                                                  |                                                                                                               |
| 4  | Setting                    | <a href="#">#5</a>   | Describe the setting, locations, and relevant dates, including periods of recruitment, exposure, follow-up, and data collection                                                                                                                                  | 3-4                                                                                                           |
| 5  |                            |                      |                                                                                                                                                                                                                                                                  |                                                                                                               |
| 6  |                            |                      |                                                                                                                                                                                                                                                                  |                                                                                                               |
| 7  |                            |                      |                                                                                                                                                                                                                                                                  |                                                                                                               |
| 8  |                            |                      |                                                                                                                                                                                                                                                                  |                                                                                                               |
| 9  |                            |                      |                                                                                                                                                                                                                                                                  |                                                                                                               |
| 10 | Eligibility criteria       | <a href="#">#6a</a>  | Give the eligibility criteria, and the sources and methods of selection of participants.                                                                                                                                                                         | 3-4                                                                                                           |
| 11 |                            |                      |                                                                                                                                                                                                                                                                  |                                                                                                               |
| 12 |                            |                      |                                                                                                                                                                                                                                                                  |                                                                                                               |
| 13 |                            |                      |                                                                                                                                                                                                                                                                  |                                                                                                               |
| 14 |                            | <a href="#">#7</a>   | Clearly define all outcomes, exposures, predictors, potential confounders, and effect modifiers. Give diagnostic criteria, if applicable                                                                                                                         | 4-5                                                                                                           |
| 15 |                            |                      |                                                                                                                                                                                                                                                                  |                                                                                                               |
| 16 |                            |                      |                                                                                                                                                                                                                                                                  |                                                                                                               |
| 17 |                            |                      |                                                                                                                                                                                                                                                                  |                                                                                                               |
| 18 |                            |                      |                                                                                                                                                                                                                                                                  |                                                                                                               |
| 19 | Data sources / measurement | <a href="#">#8</a>   | For each variable of interest give sources of data and details of methods of assessment (measurement). Describe comparability of assessment methods if there is more than one group. Give information separately for exposed and unexposed groups if applicable. | 4-5                                                                                                           |
| 20 |                            |                      |                                                                                                                                                                                                                                                                  |                                                                                                               |
| 21 |                            |                      |                                                                                                                                                                                                                                                                  |                                                                                                               |
| 22 |                            |                      |                                                                                                                                                                                                                                                                  |                                                                                                               |
| 23 |                            |                      |                                                                                                                                                                                                                                                                  |                                                                                                               |
| 24 |                            |                      |                                                                                                                                                                                                                                                                  |                                                                                                               |
| 25 |                            |                      |                                                                                                                                                                                                                                                                  |                                                                                                               |
| 26 |                            |                      |                                                                                                                                                                                                                                                                  |                                                                                                               |
| 27 |                            |                      |                                                                                                                                                                                                                                                                  |                                                                                                               |
| 28 |                            |                      |                                                                                                                                                                                                                                                                  |                                                                                                               |
| 29 | Bias                       | <a href="#">#9</a>   | Describe any efforts to address potential sources of bias                                                                                                                                                                                                        | 4(All physical examinations were performed by trained medical students according to standardized procedures.) |
| 30 |                            |                      |                                                                                                                                                                                                                                                                  |                                                                                                               |
| 31 |                            |                      |                                                                                                                                                                                                                                                                  |                                                                                                               |
| 32 |                            |                      |                                                                                                                                                                                                                                                                  |                                                                                                               |
| 33 |                            |                      |                                                                                                                                                                                                                                                                  |                                                                                                               |
| 34 |                            |                      |                                                                                                                                                                                                                                                                  |                                                                                                               |
| 35 | Study size                 | <a href="#">#10</a>  | Explain how the study size was arrived at                                                                                                                                                                                                                        | 3-4                                                                                                           |
| 36 |                            |                      |                                                                                                                                                                                                                                                                  |                                                                                                               |
| 37 |                            |                      |                                                                                                                                                                                                                                                                  |                                                                                                               |
| 38 | Quantitative variables     | <a href="#">#11</a>  | Explain how quantitative variables were handled in the analyses. If applicable, describe which groupings were chosen, and why                                                                                                                                    | 4-5                                                                                                           |
| 39 |                            |                      |                                                                                                                                                                                                                                                                  |                                                                                                               |
| 40 |                            |                      |                                                                                                                                                                                                                                                                  |                                                                                                               |
| 41 |                            |                      |                                                                                                                                                                                                                                                                  |                                                                                                               |
| 42 |                            |                      |                                                                                                                                                                                                                                                                  |                                                                                                               |
| 43 | Statistical methods        | <a href="#">#12a</a> | Describe all statistical methods, including those used to control for confounding                                                                                                                                                                                | 5                                                                                                             |
| 44 |                            |                      |                                                                                                                                                                                                                                                                  |                                                                                                               |
| 45 |                            |                      |                                                                                                                                                                                                                                                                  |                                                                                                               |
| 46 |                            |                      |                                                                                                                                                                                                                                                                  |                                                                                                               |
| 47 | Statistical methods        | <a href="#">#12b</a> | Describe any methods used to examine subgroups and interactions                                                                                                                                                                                                  | 5                                                                                                             |
| 48 |                            |                      |                                                                                                                                                                                                                                                                  |                                                                                                               |
| 49 |                            |                      |                                                                                                                                                                                                                                                                  |                                                                                                               |
| 50 |                            |                      |                                                                                                                                                                                                                                                                  |                                                                                                               |
| 51 | Statistical methods        | <a href="#">#12c</a> | Explain how missing data were addressed                                                                                                                                                                                                                          | 3-4 and Figure 1                                                                                              |
| 52 |                            |                      |                                                                                                                                                                                                                                                                  |                                                                                                               |
| 53 |                            |                      |                                                                                                                                                                                                                                                                  |                                                                                                               |
| 54 | Statistical methods        | <a href="#">#12d</a> | If applicable, describe analytical methods taking account of sampling strategy                                                                                                                                                                                   | 3-4                                                                                                           |
| 55 |                            |                      |                                                                                                                                                                                                                                                                  |                                                                                                               |
| 56 |                            |                      |                                                                                                                                                                                                                                                                  |                                                                                                               |
| 57 |                            |                      |                                                                                                                                                                                                                                                                  |                                                                                                               |
| 58 | Statistical                | <a href="#">#12e</a> | Describe any sensitivity analyses                                                                                                                                                                                                                                | 5                                                                                                             |
| 59 |                            |                      |                                                                                                                                                                                                                                                                  |                                                                                                               |
| 60 |                            |                      |                                                                                                                                                                                                                                                                  |                                                                                                               |

1 methods

2 **Results**

|    |                  |                      |                                                                                                                                                                                                                                                                                |
|----|------------------|----------------------|--------------------------------------------------------------------------------------------------------------------------------------------------------------------------------------------------------------------------------------------------------------------------------|
| 3  |                  |                      |                                                                                                                                                                                                                                                                                |
| 4  |                  |                      |                                                                                                                                                                                                                                                                                |
| 5  | Participants     | <a href="#">#13a</a> | Report numbers of individuals at each stage of study—eg numbers potentially eligible, examined for eligibility, confirmed eligible, included in the study, completing follow-up, and analysed. Give information separately for for exposed and unexposed groups if applicable. |
| 6  |                  |                      | 3-4                                                                                                                                                                                                                                                                            |
| 7  |                  |                      |                                                                                                                                                                                                                                                                                |
| 8  |                  |                      |                                                                                                                                                                                                                                                                                |
| 9  |                  |                      |                                                                                                                                                                                                                                                                                |
| 10 |                  |                      |                                                                                                                                                                                                                                                                                |
| 11 |                  |                      |                                                                                                                                                                                                                                                                                |
| 12 |                  |                      |                                                                                                                                                                                                                                                                                |
| 13 |                  |                      |                                                                                                                                                                                                                                                                                |
| 14 |                  |                      |                                                                                                                                                                                                                                                                                |
| 15 | Participants     | <a href="#">#13b</a> | Give reasons for non-participation at each stage                                                                                                                                                                                                                               |
| 16 |                  |                      | 3-4 (Figure 1)                                                                                                                                                                                                                                                                 |
| 17 | Participants     | <a href="#">#13c</a> | Consider use of a flow diagram                                                                                                                                                                                                                                                 |
| 18 |                  |                      | Figure 1                                                                                                                                                                                                                                                                       |
| 19 |                  |                      |                                                                                                                                                                                                                                                                                |
| 20 | Descriptive data | <a href="#">#14a</a> | Give characteristics of study participants (eg demographic, clinical, social) and information on exposures and potential confounders. Give information separately for exposed and unexposed groups if applicable.                                                              |
| 21 |                  |                      | 5-8                                                                                                                                                                                                                                                                            |
| 22 |                  |                      |                                                                                                                                                                                                                                                                                |
| 23 |                  |                      |                                                                                                                                                                                                                                                                                |
| 24 |                  |                      |                                                                                                                                                                                                                                                                                |
| 25 |                  |                      |                                                                                                                                                                                                                                                                                |
| 26 |                  |                      |                                                                                                                                                                                                                                                                                |
| 27 |                  |                      |                                                                                                                                                                                                                                                                                |
| 28 | Descriptive data | <a href="#">#14b</a> | Indicate number of participants with missing data for each variable of interest                                                                                                                                                                                                |
| 29 |                  |                      | 3(Figure 1)                                                                                                                                                                                                                                                                    |
| 30 |                  |                      |                                                                                                                                                                                                                                                                                |
| 31 |                  |                      |                                                                                                                                                                                                                                                                                |
| 32 | Outcome data     | <a href="#">#15</a>  | Report numbers of outcome events or summary measures. Give information separately for exposed and unexposed groups if applicable.                                                                                                                                              |
| 33 |                  |                      | 5-8                                                                                                                                                                                                                                                                            |
| 34 |                  |                      |                                                                                                                                                                                                                                                                                |
| 35 |                  |                      |                                                                                                                                                                                                                                                                                |
| 36 |                  |                      |                                                                                                                                                                                                                                                                                |
| 37 | Main results     | <a href="#">#16a</a> | Give unadjusted estimates and, if applicable, confounder-adjusted estimates and their precision (eg, 95% confidence interval). Make clear which confounders were adjusted for and why they were included                                                                       |
| 38 |                  |                      | NO (The study did not adjust for confounding factors.)                                                                                                                                                                                                                         |
| 39 |                  |                      |                                                                                                                                                                                                                                                                                |
| 40 |                  |                      |                                                                                                                                                                                                                                                                                |
| 41 |                  |                      |                                                                                                                                                                                                                                                                                |
| 42 |                  |                      |                                                                                                                                                                                                                                                                                |
| 43 |                  |                      |                                                                                                                                                                                                                                                                                |
| 44 |                  |                      |                                                                                                                                                                                                                                                                                |
| 45 | Main results     | <a href="#">#16b</a> | Report category boundaries when continuous variables were categorized                                                                                                                                                                                                          |
| 46 |                  |                      | 3-4                                                                                                                                                                                                                                                                            |
| 47 |                  |                      |                                                                                                                                                                                                                                                                                |
| 48 |                  |                      |                                                                                                                                                                                                                                                                                |
| 49 | Main results     | <a href="#">#16c</a> | If relevant, consider translating estimates of relative risk into absolute risk for a meaningful time period                                                                                                                                                                   |
| 50 |                  |                      | NO                                                                                                                                                                                                                                                                             |
| 51 |                  |                      |                                                                                                                                                                                                                                                                                |
| 52 |                  |                      |                                                                                                                                                                                                                                                                                |
| 53 |                  |                      |                                                                                                                                                                                                                                                                                |
| 54 | Other analyses   | <a href="#">#17</a>  | Report other analyses done—e.g., analyses of subgroups and interactions, and sensitivity analyses                                                                                                                                                                              |
| 55 |                  |                      | 6-8(The study was divided into two subgroups: men and                                                                                                                                                                                                                          |
| 56 |                  |                      |                                                                                                                                                                                                                                                                                |
| 57 |                  |                      |                                                                                                                                                                                                                                                                                |
| 58 |                  |                      |                                                                                                                                                                                                                                                                                |
| 59 |                  |                      |                                                                                                                                                                                                                                                                                |
| 60 |                  |                      |                                                                                                                                                                                                                                                                                |

women)

## Discussion

|                          |                     |                                                                                                                                                                  |      |
|--------------------------|---------------------|------------------------------------------------------------------------------------------------------------------------------------------------------------------|------|
| Key results              | <a href="#">#18</a> | Summarise key results with reference to study objectives                                                                                                         | 8-11 |
| Limitations              | <a href="#">#19</a> | Discuss limitations of the study, taking into account sources of potential bias or imprecision. Discuss both direction and magnitude of any potential bias.      | 11   |
| Interpretation           | <a href="#">#20</a> | Give a cautious overall interpretation considering objectives, limitations, multiplicity of analyses, results from similar studies, and other relevant evidence. | 8-11 |
| Generalisability         | <a href="#">#21</a> | Discuss the generalisability (external validity) of the study results                                                                                            | 11   |
| <b>Other Information</b> |                     |                                                                                                                                                                  |      |
| Funding                  | <a href="#">#22</a> | Give the source of funding and the role of the funders for the present study and, if applicable, for the original study on which the present article is based    | 12   |

None The STROBE checklist is distributed under the terms of the Creative Commons Attribution License CC-BY. This checklist can be completed online using <https://www.goodreports.org/>, a tool made by the [EQUATOR Network](#) in collaboration with [Penelope.ai](#)
